# Supplementary material for: N,N′,N′′-Trisubstituted guanidine derivatives as DNA-intercalators: synthesis, crystal structures and biophysical investigations
Source: Royal Society of Chemistry journal article supplement (doi:10.1039/d3nj01327h), 2023-01-01
Supplement: d3nj01327h1.pdf [file d3nj01327h1.pdf]

**N,N',N''-Trisubstituted Guanidine Derivatives as DNA-Intercalators:  
Synthesis, Crystal Structures and Biophysical Investigations**

R. Durga Priyadharshini, P. N. Sathishkumar, M. Bensingh, N. Bhuvanesh, K. N. Vennila, R.  
Karvembu and Kuppanagounder P. Elango\*

**SUPPORTING INFORMATION**

## General methods

UV-Visible spectra were recorded in a Shimadzu UV-640 instrument.  $^1\text{H}$  and  $^{13}\text{C}$  NMR spectra were recorded on a Bruker 500 and 126 MHz spectrometer, respectively. DMSO- $d_6$  was used as solvent and tetramethylsilane (TMS) was used as an internal standard. High resolution mass spectra were recorded on a Thermo Exactive Orbitrap instrument.

## X-ray crystallography

A Leica MZ 75 microscope was used to identify a suitable colourless block with very well-defined faces. The crystal mounted on a nylon loop was then placed in a cold nitrogen stream (Oxford) maintained at 110 K. A BRUKER Quest X-ray (fixed-Chi geometry) diffractometer with a PHOTON II detector was employed for crystal screening, unit cell determination and data collection. The goniometer was controlled using the APEX3 software suite.<sup>1</sup> The X-ray radiation employed was generated from a Mo-I $\mu$ s X-ray tube ( $K\alpha = 0.71073\text{\AA}$ ). Integrated intensity information for each reflection was obtained by reduction of the data frames with the program APEX3.<sup>1</sup> The integration method employed a three-dimensional profiling algorithm and all the data were corrected for Lorentz and polarization factors, as well as for crystal decay effects. Finally, the data were merged and scaled to produce a suitable data set. The absorption correction program SADABS<sup>2</sup> was employed to correct the data for absorption effects. Hydrogen atoms were placed in idealized positions and were set riding on the respective parent atoms. All the non-hydrogen atoms were refined with anisotropic thermal parameters. Absence of additional symmetry and voids were confirmed using PLATON (ADDSYM).<sup>3</sup> The structures were refined (weighted least squares refinement on  $F^2$ ) to convergence.<sup>4,5</sup> Olex2 was employed for the final data presentation and structure plots.<sup>4</sup>

1. G. Murtaza , A. Badshah , M. Said , H. Khan , A. Khan , S. Khan , S. Siddiq , M. I. Choudhary , J. Boudreauc and F. G. Fontainec , *Dalton Trans.*, **2011**, 40 , 9202 —9211
2. Murtaza, G.; Rauf, M. K.; Badshah, A.; Ebihara, M.; Said, M.; Gielen, M.; de Vos, D.; Dilshad, E.; Mirza, B. Synthesis, structural characterization and in vitro biological screening of some homoleptic copper(II) complexes with substituted guanidines. *Eur. J. Med. Chem.* **2012**, 48, 26– 35, DOI: 10.1016/j.ejmech.2011.11.029
3. Jeyalakshmi, K.; Selvakumaran, N.; Bhuvanesh, N. S. P.; Sreekanth, A.; Karvembu, R. DNA/protein binding and cytotoxicity studies of copper(II) complexes containing N,

N', N''-trisubstituted guanidine ligands. *RSC Adv.* **2014**, 4, 17179–17195, DOI: 10.1039/c4ra01459f

4. Jeyalakshmi, K.; Arun, Y.; Bhuvanesh, N. S. P.; Perumal, P. T.; Sreekanth, A.; Karvembu, R. DNA/protein binding, DNA cleavage, cytotoxicity, superoxide radical scavenging and molecular docking studies of copper(II) complexes containing N-benzyl-N'-aryl-N''-benzoylguanidine ligands. *Inorg. Chem. Front.* **2015**, 2, 780–798, DOI: 10.1039/C4QI00234B
5. Jeyalakshmi, K.; Haribabu, J.; Balachandran, C.; Swaminathan, S.; Bhuvanesh, N. S. P.; Karvembu, R. Coordination Behavior of N,N',N''-Trisubstituted Guanidine Ligands in Their Ru–Arene Complexes: Synthetic, DNA/Protein Binding, and Cytotoxic Studies. *Organometallics* **2019**, 38, 753–770, DOI: 10.1021/acs.organomet.8b00702

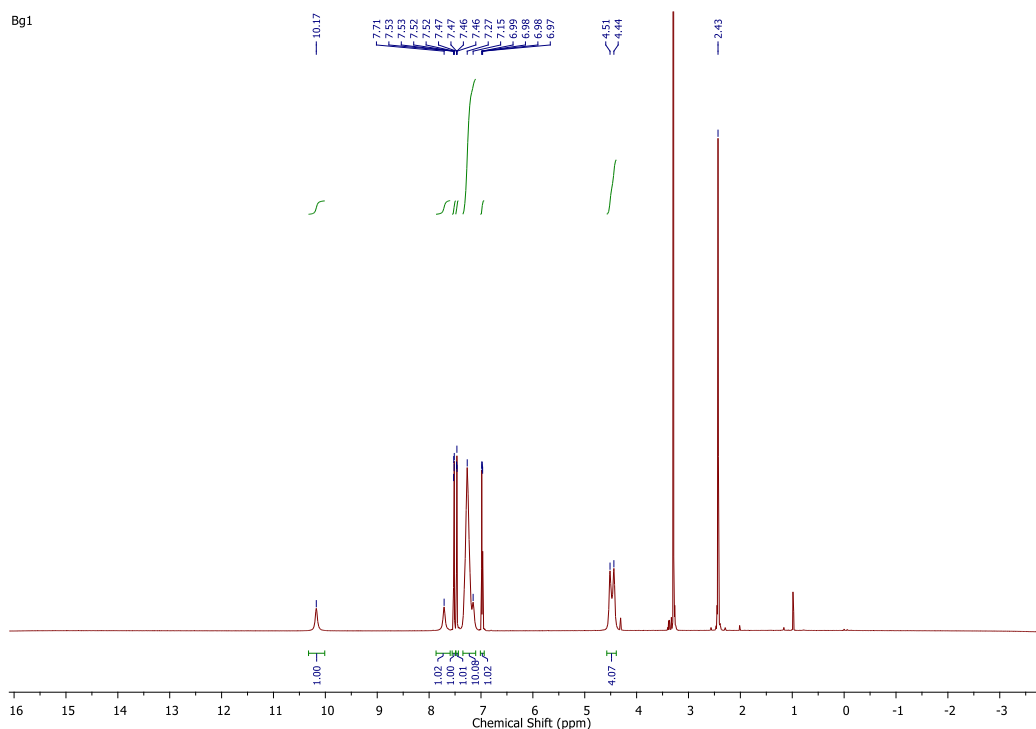

**Fig. S1.**  $^1\text{H}$  NMR spectrum of L1

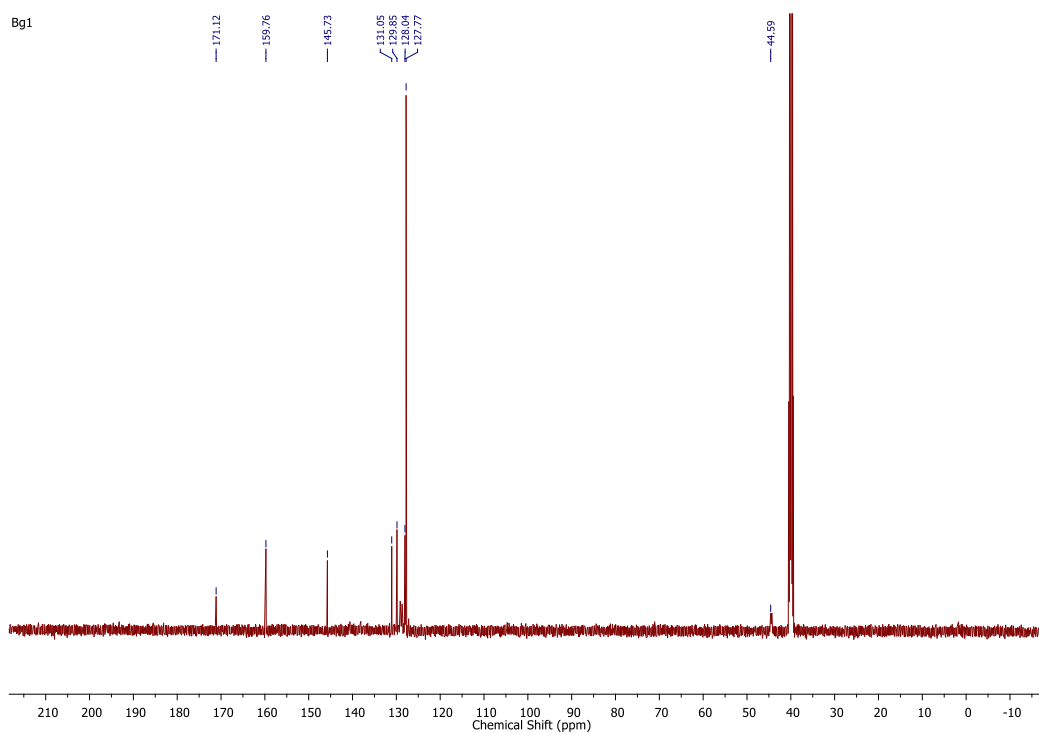

**Fig. S2.**  $^{13}\text{C}$  NMR spectrum of **L1**

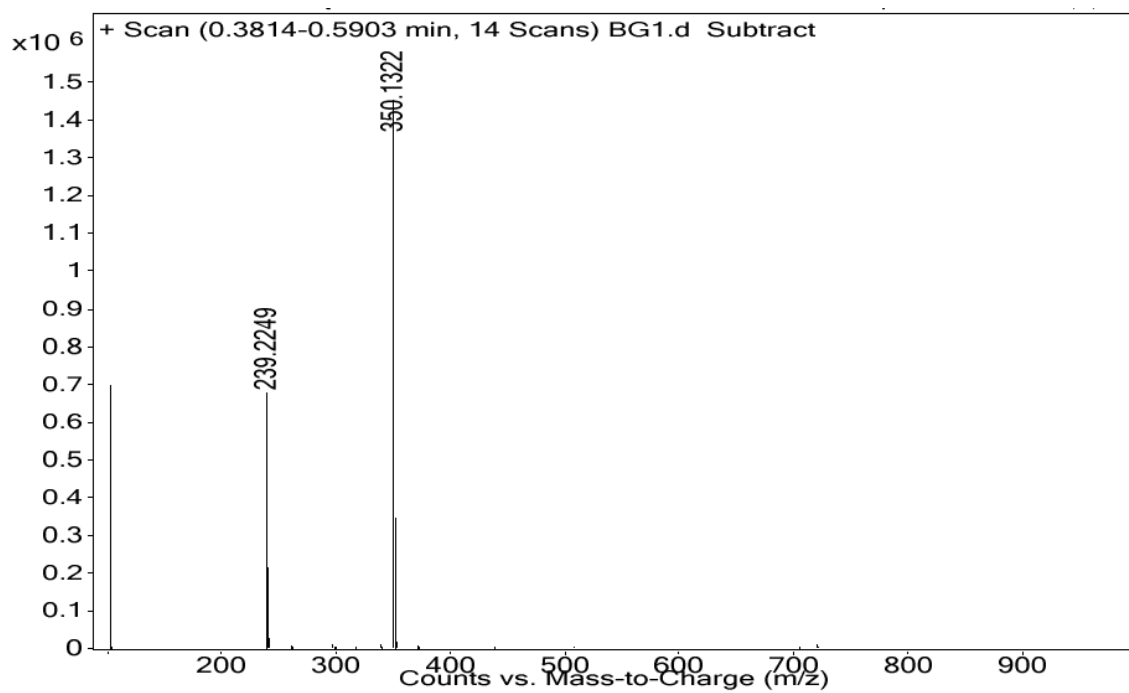

**Fig. S3.** Mass spectrum of **L1**

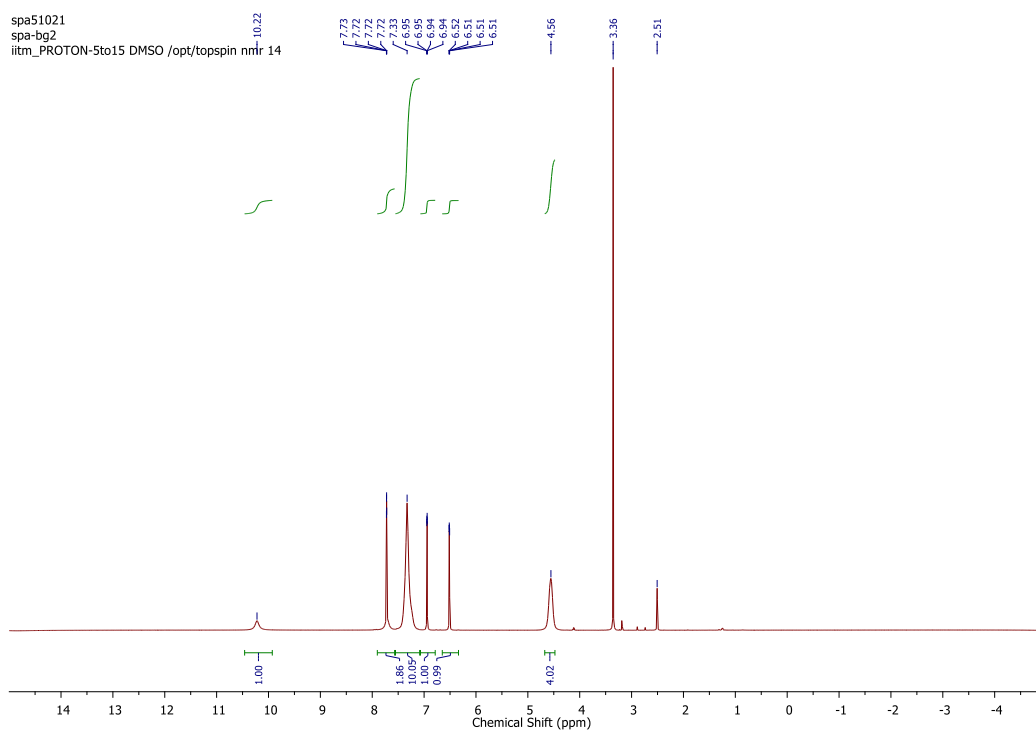

**Fig. S4.**  $^1\text{H}$  NMR spectrum of L2

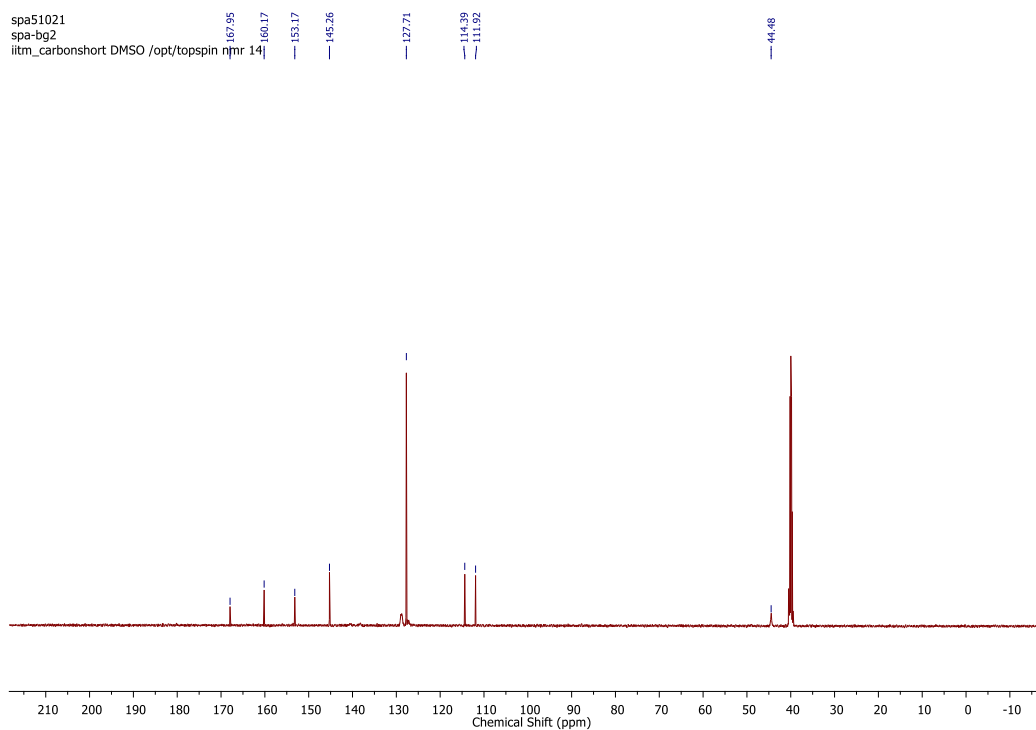

**Fig. S5.**  $^{13}\text{C}$  NMR spectrum of **L2**



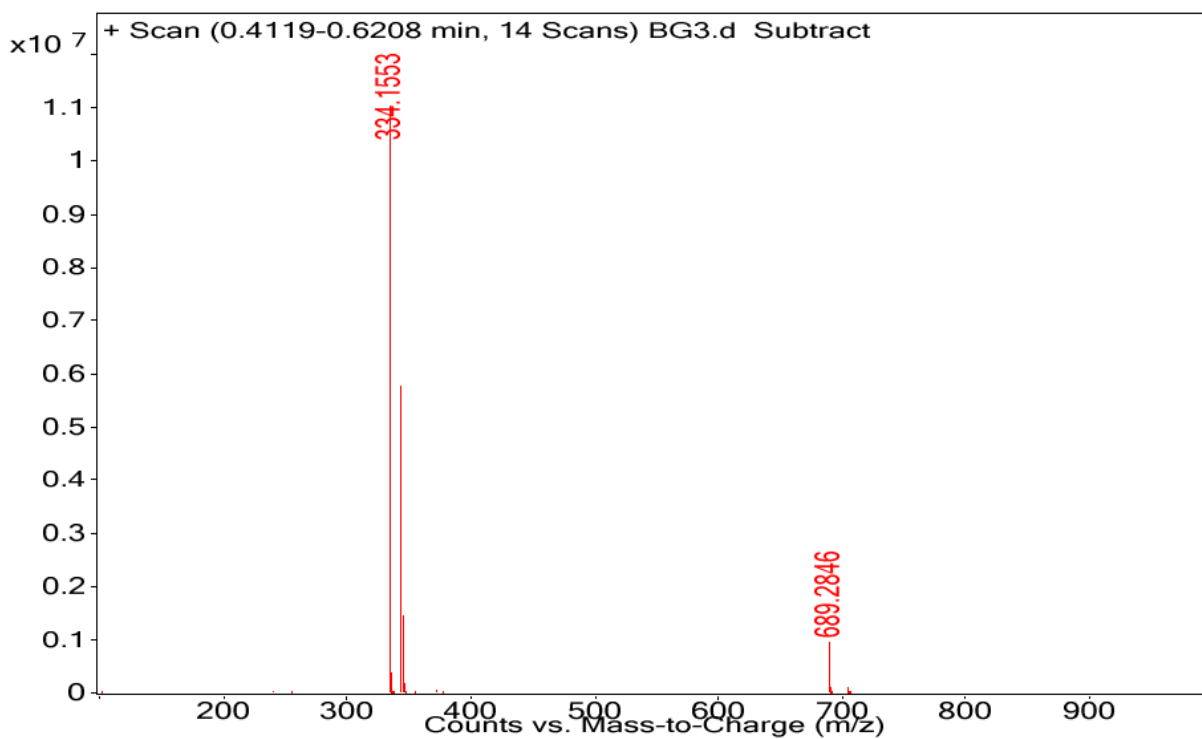

**Fig. S6.** Mass spectrum of **L2**

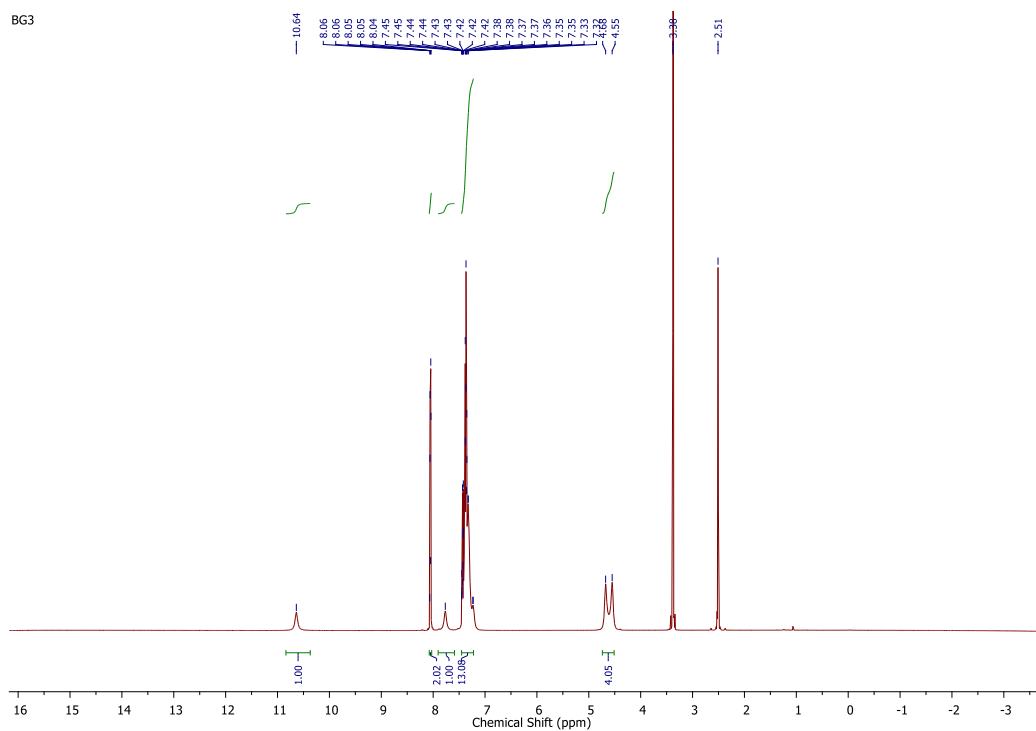

**Fig. S7.** <sup>1</sup>H NMR spectrum of L3

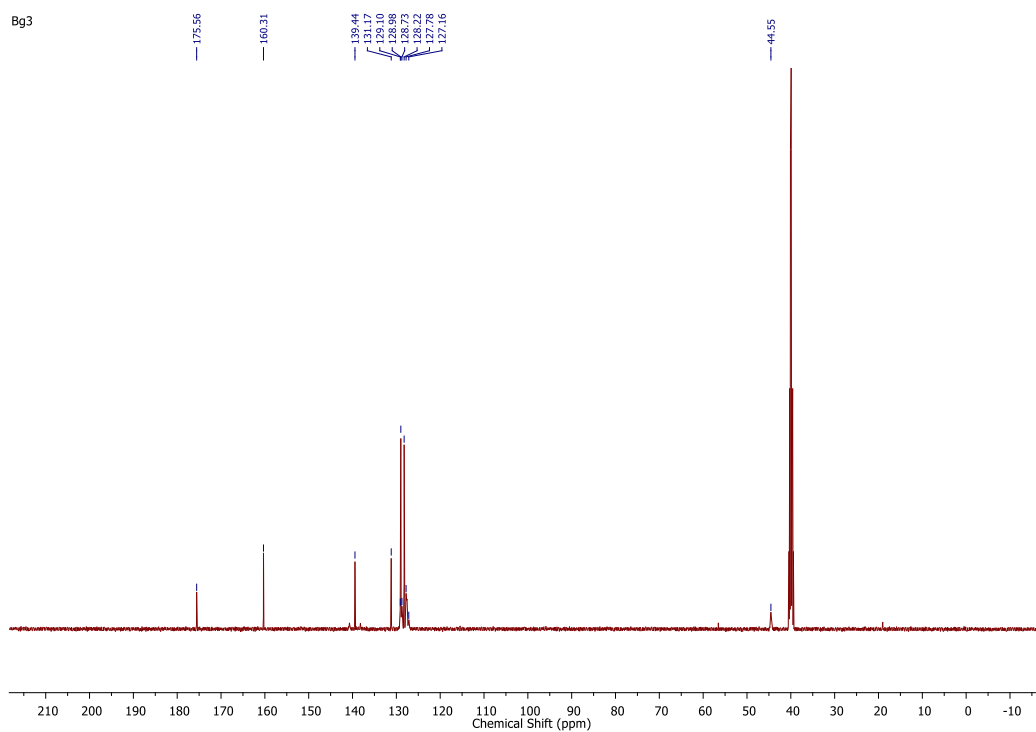

**Fig. S8.**  $^{13}\text{C}$  NMR spectrum of **L3**

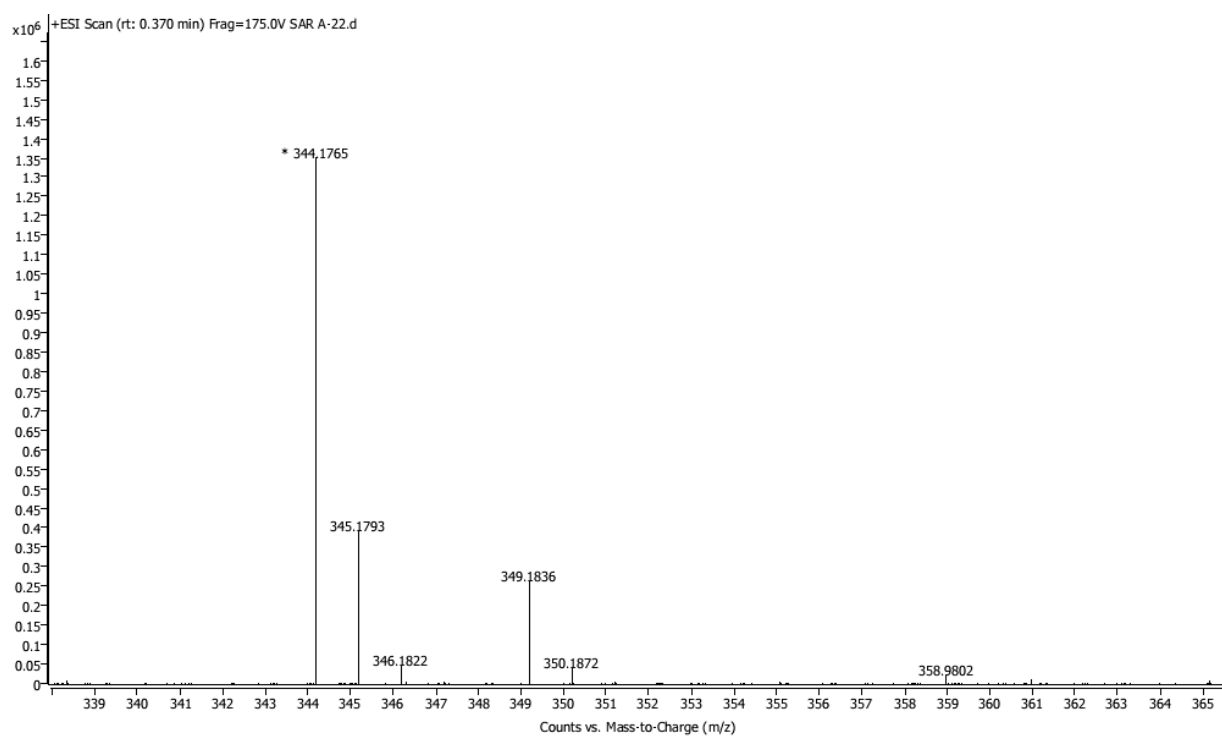

**Fig. S9.** Mass spectrum of **L3**

**Table S1.** Crystal data and refinement parameters for **L1-L3**

|                                 | <b>L1</b>                                         | <b>L2</b>                                                     | <b>L3</b>                                        |
|---------------------------------|---------------------------------------------------|---------------------------------------------------------------|--------------------------------------------------|
| Empirical formula               | C <sub>20</sub> H <sub>19</sub> N <sub>3</sub> OS | C <sub>20</sub> H <sub>19</sub> N <sub>3</sub> O <sub>2</sub> | C <sub>22</sub> H <sub>21</sub> N <sub>3</sub> O |
| Formula weight                  | 349.44                                            | 333.38                                                        | 343.42                                           |
| Temperature                     | 110.0 K                                           | 110.0 K                                                       | 110.0 K                                          |
| Wavelength                      | 0.71073 Å                                         | 0.71073 Å                                                     | 0.71073 Å                                        |
| Crystal system                  | Orthorhombic                                      | Triclinic                                                     | Orthorhombic                                     |
| Space group                     | <i>Pbca</i>                                       | <i>P-1</i>                                                    | <i>Pbca</i>                                      |
| Unit cell dimensions            | 13.2629(10) Å                                     | 9.3435(5) Å                                                   | 15.0645(7) Å                                     |
| a                               | 12.0772(9) Å                                      | 12.5993(7) Å                                                  | 11.7756(5) Å                                     |
| b                               | 22.1882(16) Å                                     | 15.2448(9) Å                                                  | 20.4088(9) Å                                     |
| c                               | 90°                                               | 84.540(2)°                                                    | 90°                                              |
| α                               | 90°                                               | 72.858(2)°                                                    | 90°                                              |
| β                               | 90°                                               | 81.087(2)°                                                    | 90°                                              |
| γ                               |                                                   |                                                               |                                                  |
| Volume                          | 3554.1(5) Å <sup>3</sup>                          | 1691.88(17) Å <sup>3</sup>                                    | 3620.4(3) Å <sup>3</sup>                         |
| Z                               | 8                                                 | 4                                                             | 8                                                |
| Density (calculated)            | 1.306 Mg/m <sup>3</sup>                           | 1.309 Mg/m <sup>3</sup>                                       | 1.260 Mg/m <sup>3</sup>                          |
| Absorption coefficient          | 0.195 mm <sup>-1</sup>                            | 0.086 mm <sup>-1</sup>                                        | 0.079 mm <sup>-1</sup>                           |
| <i>F</i> (000)                  | 1472                                              | 704                                                           | 1456                                             |
| Crystal size                    | 0.547 × 0.492 × 0.458 mm <sup>3</sup>             | 0.208 × 0.186 × 0.038 mm <sup>3</sup>                         | 0.407 × 0.326 × 0.216 mm <sup>3</sup>            |
| Theta range for data collection | 2.393 to 24.998°                                  | 2.098 to 24.998°                                              | 2.411 to 27.483°                                 |
| Index ranges                    | -15 ≤ h ≤ 15,<br>-14 ≤ k ≤ 13,<br>-23 ≤ l ≤ 26    | -11 ≤ h ≤ 11,<br>-14 ≤ k ≤ 14,<br>-18 ≤ l ≤ 18                | -19 ≤ h ≤ 19,<br>-15 ≤ k ≤ 15,<br>-26 ≤ l ≤ 26   |
| Reflections collected           | 27648                                             | 34170                                                         | 30883                                            |
| Independent reflections         | 3127 [R(int)=0.0432]                              | 5950 [R(int)=0.0397]                                          | 4131 [R(int) = 0.0477]                           |
| Completeness to theta =         | 24.998°<br>100.0 %                                | 24.998°<br>99.9 %                                             | 25.242°<br>99.8 %                                |
| Absorption correction           | Semi-empirical from equivalents                   | Semi-empirical from equivalents                               | Semi-empirical from equivalents                  |
| Max. and min. transmission      | 0.4305 and 0.3809                                 | 0.7456 and 0.6997                                             | 0.4305 and 0.3944                                |

|                                |                                    |                                    |                                    |
|--------------------------------|------------------------------------|------------------------------------|------------------------------------|
| Data / restraints / parameters | 3127 / 0 / 226                     | 5950 / 0 / 451                     | 4131 / 0 / 235                     |
| Goodness-of-fit on $F^2$       | 1.036                              | 1.064                              | 1.035                              |
| Final R indices [I>2sigma(I)]  | R1 = 0.0328, wR2 = 0.0773          | R1 = 0.0362, wR2 = 0.0818          | R1 = 0.0399, wR2 = 0.0914          |
| R indices (all data)           | R1 = 0.0412, wR2 = 0.0830          | R1 = 0.0486, wR2 = 0.0921          | R1 = 0.0542, wR2 = 0.0987          |
| Largest diff. peak and hole    | 0.308 and -0.257 e.Å <sup>-3</sup> | 0.219 and -0.265 e.Å <sup>-3</sup> | 0.171 and -0.197 e.Å <sup>-3</sup> |
| CCDC No.                       | 2218225                            | 2218226                            | 2218227                            |

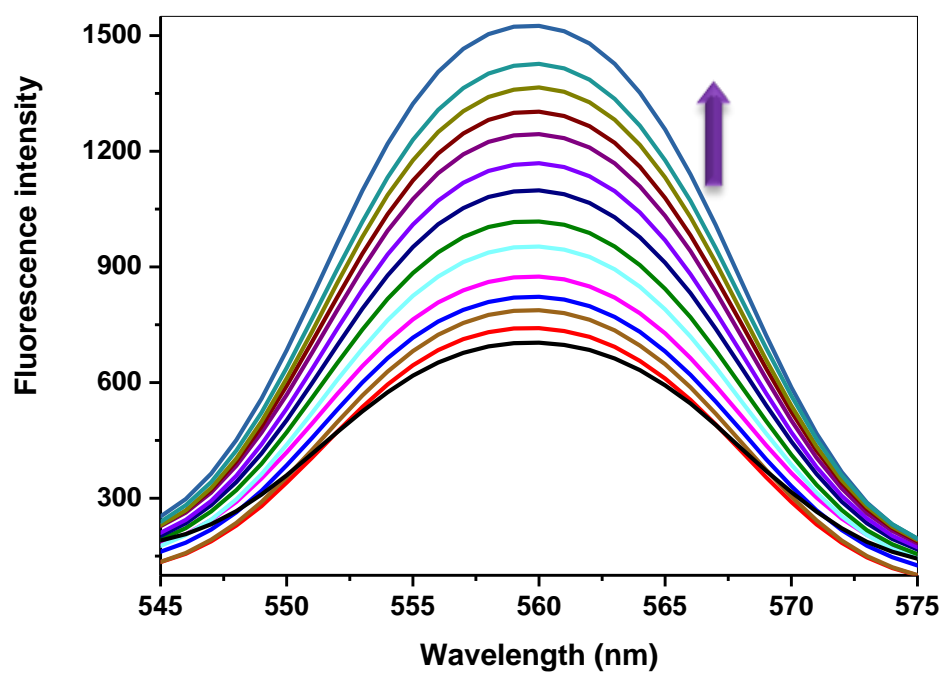

**Fig. S10.** Fluorescence spectra of L2 (50  $\mu\text{M}$ ) with incremental addition of CT-DNA (0-6  $\mu\text{M}$ ) in Tris-HCl buffer of pH 7.4 at 308 K.

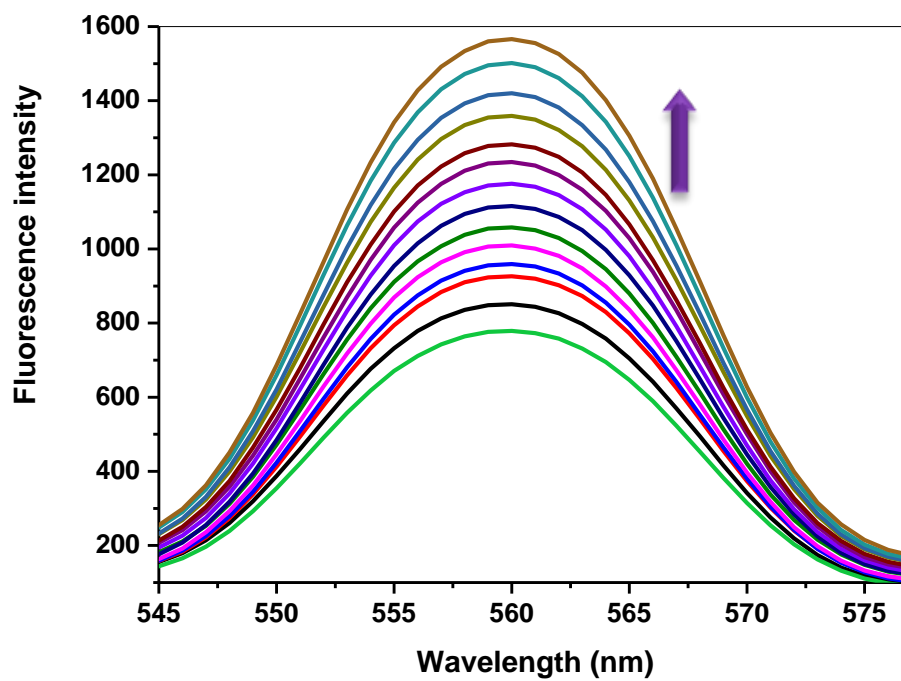

**Fig. S11.** Fluorescence spectra of L2 (50  $\mu\text{M}$ ) with incremental addition of CT-DNA (0-6  $\mu\text{M}$ ) in Tris-HCl buffer of pH 7.4 at 318 K.



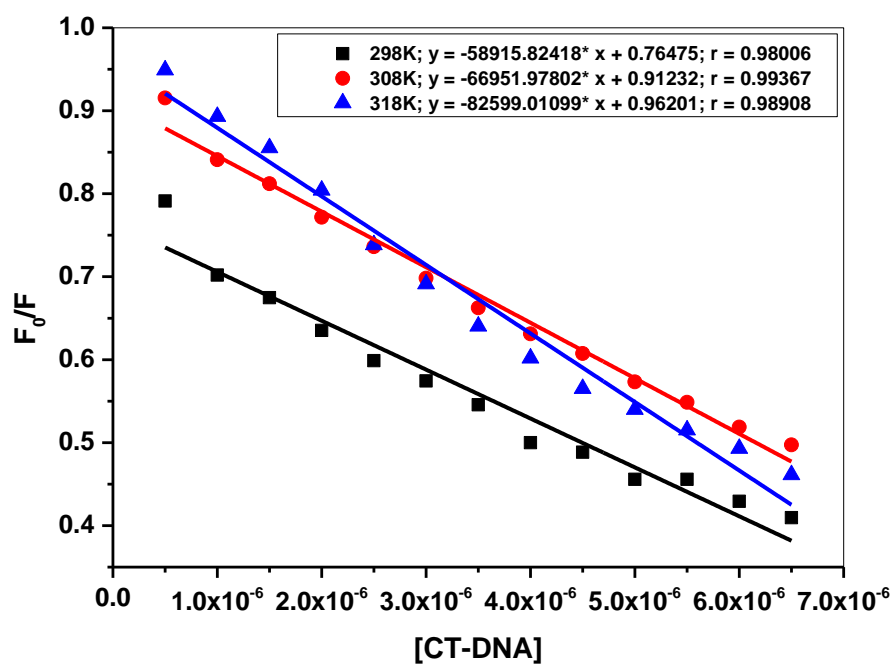

**Fig. S12.** Plot of  $F_0/F$  versus [CT-DNA] for **L2** by CT-DNA at three different temperatures.

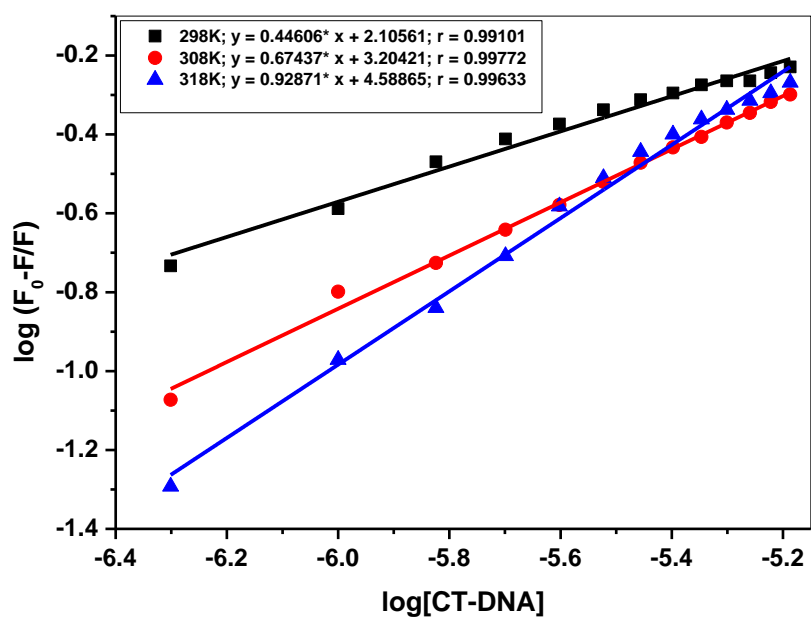

**Fig. S13.** Plot of  $\log [F_0 - F/F]$  vs.  $\log [CT-DNA]$  of **L2** at three different temperatures.

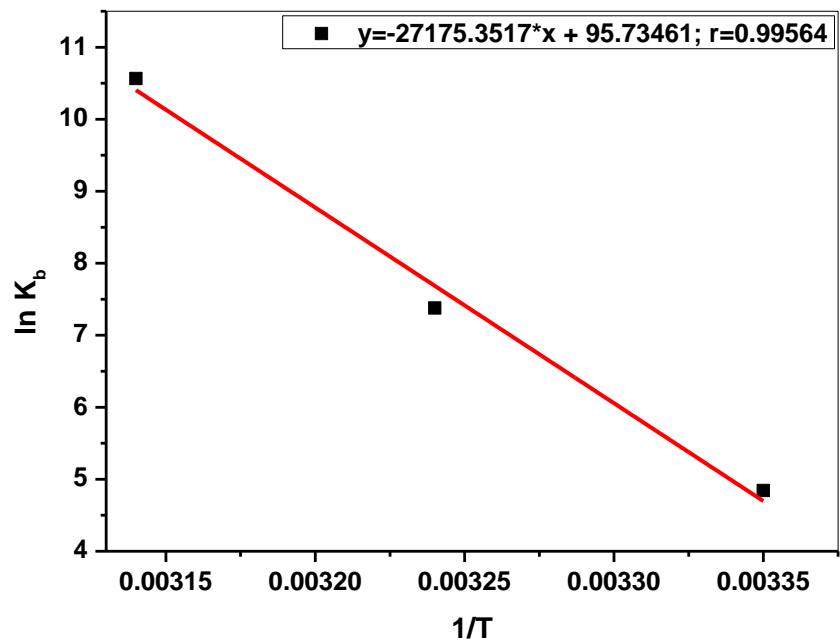

**Fig. S14.** van't Hoff plot of L2 with CT-DNA.

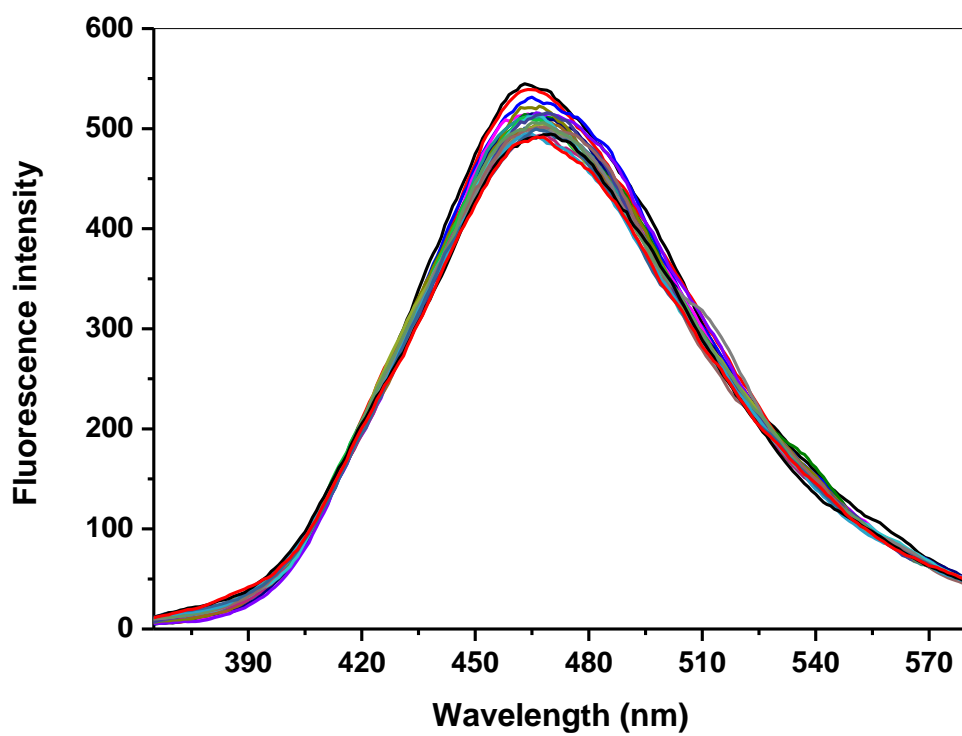

**Fig. S15.** Fluorescence changes for the titration of **L2** (0-30  $\mu\text{M}$ ) with CT-DNA-Hoechst 33258 system

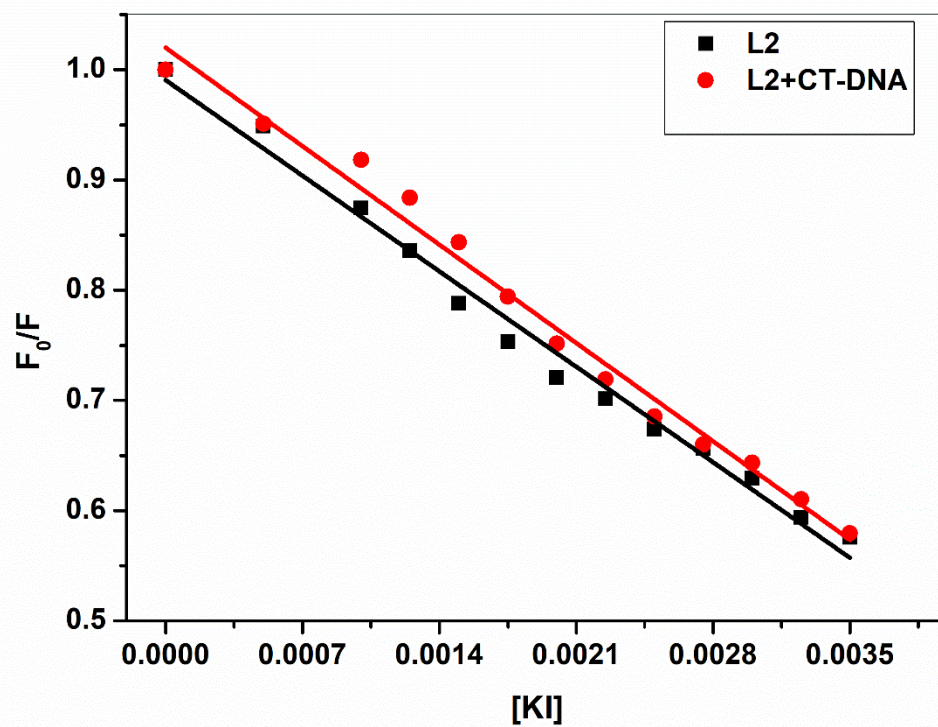

**Fig. S16.** Fluorescence quenching plot of L2 by KI in the absence and presence of CT-DNA

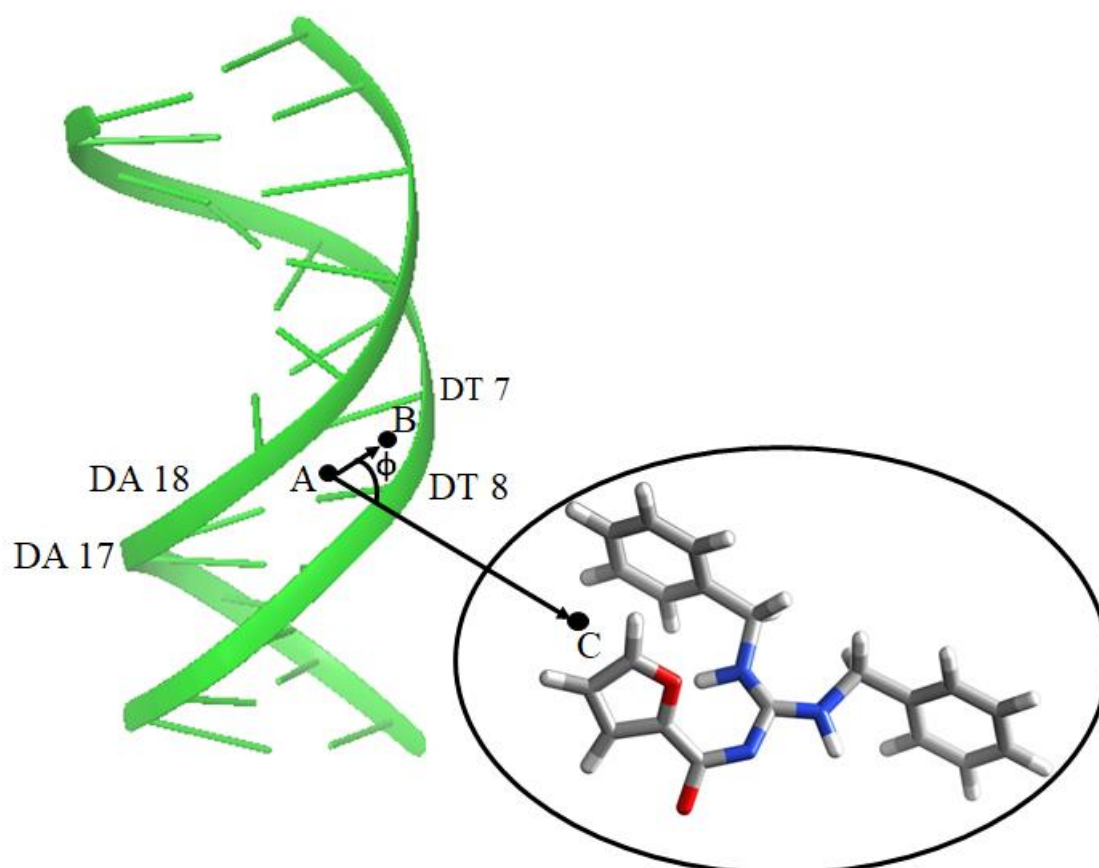

**Fig. S17.** Two-dimensional view of the vectors chosen for collective variables. Point A is the COM of four bases labeled (DT7, DT8, DA17 and DA18); B is the COM of the sugar groups of DT7 and DA18. Point C is the COM of the drug L2. AB is the body fixed vector and AC is the distance variable. The angle between AB and AC is the angle variable.

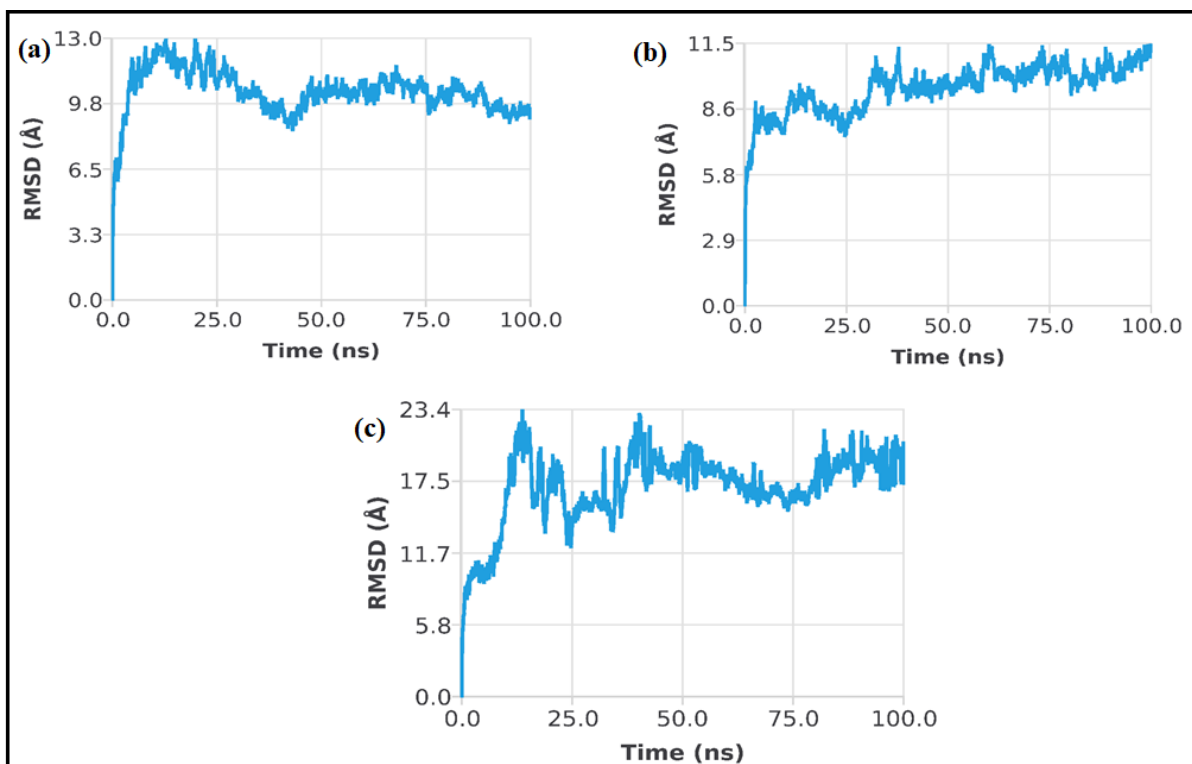

**Fig. S18.** RMSD graphs for L1 (a), L2 (b) and L3 (c)

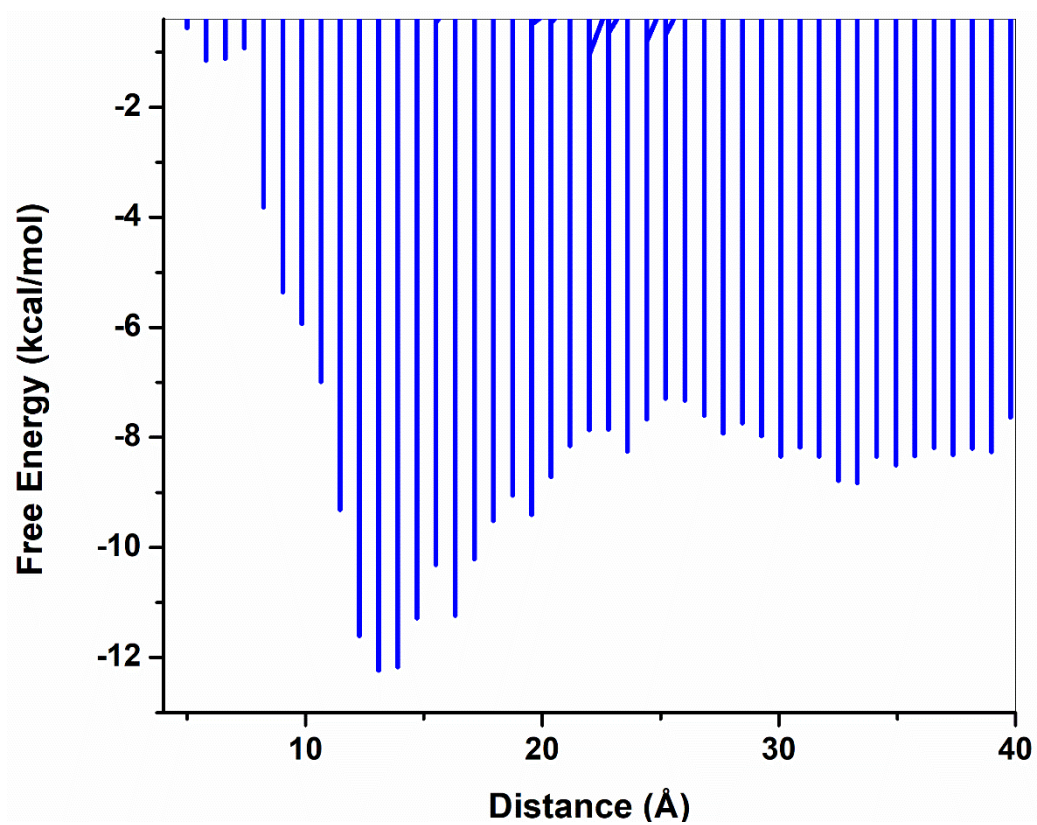

**Fig. S19.** 1D free energy profile of L1 ligand.



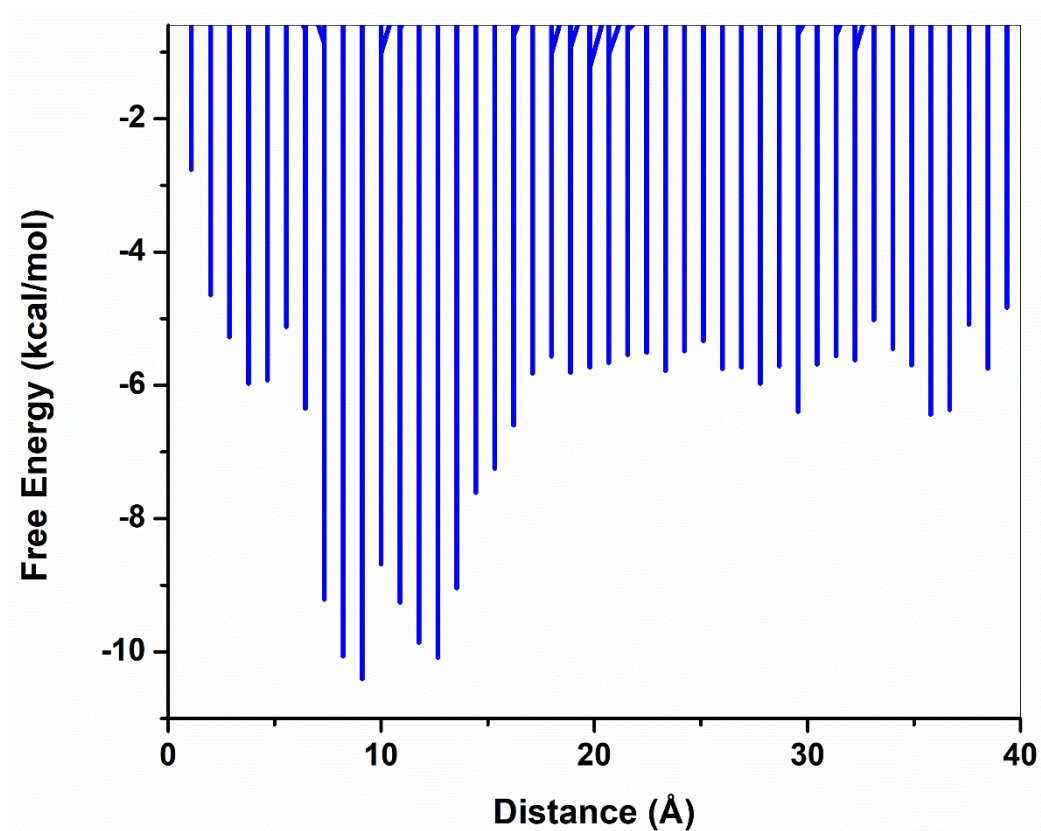

**Fig. S20.** 1D Free energy profile of L2 ligand.

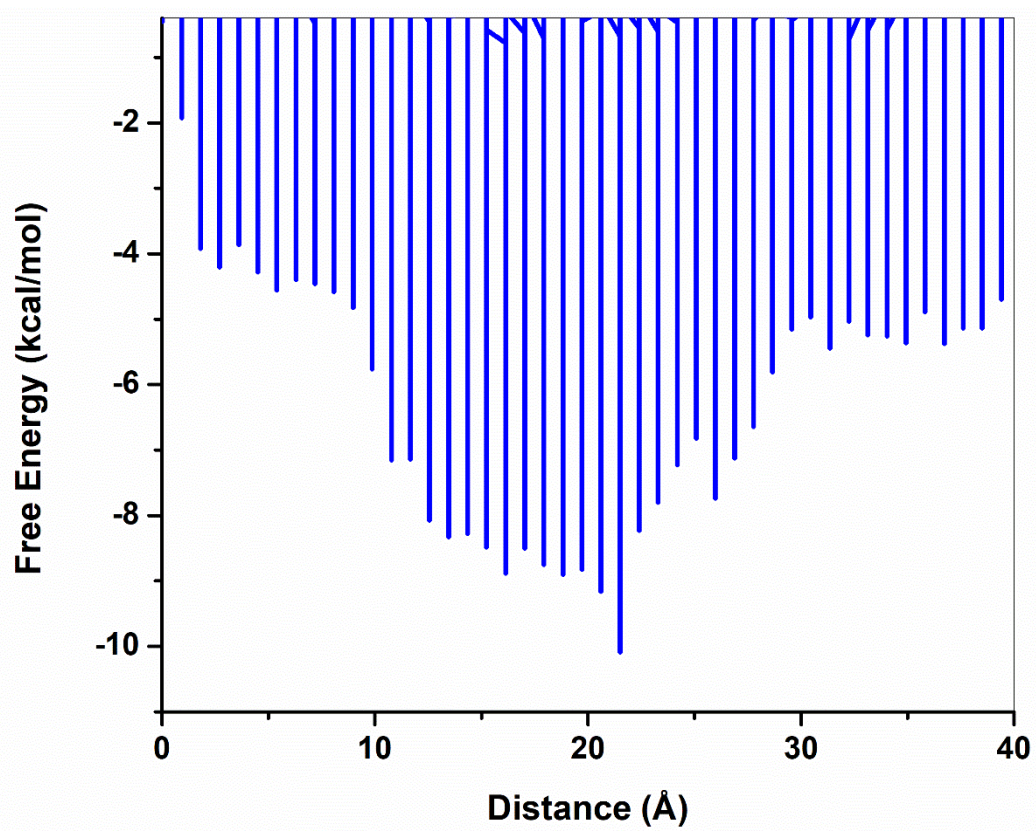

**Fig. S21.** 1D Free energy profile of L3 ligand.

**Table S2.** Type of interactions present in the free energy minimum of L1 ligand

| S.No | Frame number | Type of interactions                                                      | Interacting residues | Collective variables (Distance (Å), Angle (°)) | Energy kcal/mol | Rise DC11 DG14  | Roll DC11 DG14   | Twist DC11 DG14   |
|------|--------------|---------------------------------------------------------------------------|----------------------|------------------------------------------------|-----------------|-----------------|------------------|-------------------|
| 1    | 208          | $\pi$ - $\pi$ (1), $\pi$ -cation (2), water mediated hydrogen bonding (1) | DA17, DC13,          | 12.36, 96.90                                   | -11.50          | 2.51<br>10.8    | 94.13<br>11.61   | 57.17<br>-28.54   |
| 2    | 403          | Unbound                                                                   | -                    | 14.34, 103.57                                  | -10.70          | -6.24<br>12.78  | -24.58<br>-14.94 | -91.39<br>-39.39  |
| 3    | 73           | Unbound                                                                   | -                    | 15.08, 100.65                                  | -11.28          | 8.81<br>11.75   | -11.75<br>-18.88 | 31.39<br>-44.77   |
| 4    | 849          | $\pi$ - $\pi$ (1), water mediated hydrogen bond (1)                       | DC-11                | 14.27, 98.32                                   | -11.98          | -12.5<br>12.55  | -6.93<br>-43.86  | -52.26<br>-51.78  |
| 5    | 620          | Water mediated hydrogen bond (1)                                          | DC-9                 | 13.77,102.40                                   | -12.17          | -6.98<br>15.04  | -15.29<br>-77.75 | -99.86<br>41.39   |
| 6    | 863          | Unbound                                                                   | -                    | 13.67,102.99                                   | -11.31          | -6.2<br>-12.83  | -29.76<br>-60.69 | -121.97<br>-43.8  |
| 7    | 860          | $\pi$ - cation (1), water mediated hydrogen bond (2)                      | DC-11                | 13.14,101.53                                   | -11.74          | -10.08<br>11.67 | -6.41<br>-68.55  | -89.8<br>-52.24   |
| 8    | 442          | Unbound                                                                   | -                    | 12.82,102.99                                   | -10.58          | -7.6<br>6.99    | -3.05<br>-73.13  | -108.5<br>-9.34   |
| 9    | 889          | Unbound                                                                   | -                    | 12.25,99.49                                    | -10.81          | -7.5<br>11.22   | -28.63<br>-18.08 | -98.86<br>-22.83  |
| 10   | 890          | Unbound                                                                   | -                    | 12.75,94.23                                    | -12.02          | -7.36<br>9.35   | -25.65<br>-44.64 | -85.28<br>-68.27  |
| 11   | 864          | Unbound                                                                   | -                    | 13.24,96.28                                    | -12.23          | -9.03<br>10.15  | -12.61<br>-52    | -112.68<br>-62.82 |
| 13   | 859          | Unbound                                                                   | -                    | 13.38,93.07                                    | -12.02          | -8.55<br>10.53  | -18.71<br>-47.99 | -86.58<br>61.49   |
| 14   | 172          | Unbound                                                                   | -                    | 13.74,93.36                                    | -11.18          | 2.33            | 89.08            | 122.4             |

|    |     |                                                                        |              |              |        |        |        |         |
|----|-----|------------------------------------------------------------------------|--------------|--------------|--------|--------|--------|---------|
|    |     |                                                                        |              |              |        | 12.12  | -17.47 | -62.85  |
| 15 | 862 | Unbound                                                                | -            | 13.74,90.44  | -10.48 | -8     | -1.61  | -116.42 |
|    |     |                                                                        |              |              |        | 11.86  | -30.11 | -61.65  |
| 16 | 876 | Unbound                                                                | -            | 12.60,91.02  | -9.61  | -6.05  | -11.74 | -67.73  |
|    |     |                                                                        |              |              |        | 13.69  | -38.56 | -29.1   |
| 17 | 885 | Hydrogen bonds (2)                                                     | DC-9, DC-11  | 12.43,90.15  | -9.61  | -6.84  | 14.83  | -70.75  |
|    |     |                                                                        |              |              |        | 10.95  | 1.99   | -45.18  |
| 18 | 861 | $\pi$ - $\pi$ (2), $\pi$ -cation (2), Water mediated hydrogen bond (1) | DC-11, DG-10 | 12.39,91.61  | -9.61  | -7.52  | -38.32 | -89.86  |
|    |     |                                                                        |              |              |        | 12.67  | -53.05 | -57.82  |
| 19 | 879 | Unbound                                                                | -            | 12.32,91.90  | -10.90 | -6.96  | 1.18   | -88.9   |
|    |     |                                                                        |              |              |        | 12.62  | -20.89 | -4.32   |
| 20 | 888 | Unbound                                                                | -            | 12.04,94.53  | -10.90 | -5.69  | -7.02  | -106.11 |
|    |     |                                                                        |              |              |        | 11.27  | -18.21 | -43.15  |
| 21 | 829 | $\pi$ - $\pi$ (1), $\pi$ -cation (1)                                   | DC-9         | 11.86,100.36 | -9.31  | -10.03 | -1.07  | -62.27  |
|    |     |                                                                        |              |              |        | 7.93   | -15.41 | -53.69  |
| 22 | 880 | Unbound                                                                | -            | 11.61,99.49  | -9.31  | -6.51  | -17.14 | -95.58  |
|    |     |                                                                        |              |              |        | 13.52  | -77.42 | -52.62  |
| 23 | 621 | Unbound                                                                | -            | 12.29,106.49 | -8.88  | -7.5   | -10.15 | -68.83  |
|    |     |                                                                        |              |              |        | 12     | -29.81 | -58.07  |
| 24 | 848 | $\pi$ - $\pi$ (1), Hydrogen bond (1), Water mediated hydrogen bond (2) | DC-11, DG-10 | 13.56,108.53 | -10.21 | -9.5   | -34.85 | -81.92  |
|    |     |                                                                        |              |              |        | 11.63  | -33.68 | -44.71  |
| 25 | 71  | $\pi$ -cation (1), Water mediated hydrogen bond (1)                    | DG-10        | 14.23,109.70 | -10.21 | 5.49   | -38.51 | 57.87   |
|    |     |                                                                        |              |              |        | 10.45  | -37.05 | -52.41  |
| 26 | 457 | $\pi$ - $\pi$ (1), $\pi$ -cation (1)                                   | DA-18        | 14.91,106.20 | -10.70 | -9.92  | -6.31  | -83.72  |
|    |     |                                                                        |              |              |        | 14.01  | -37.98 | -37.09  |
| 27 | 858 | Unbound                                                                | -            | 15.12,106.20 | -9.83  | -10.61 | -30.47 | -74.24  |
|    |     |                                                                        |              |              |        | 5.43   | -5.29  | -93.71  |
| 28 | 852 | $\pi$ - $\pi$ (1)                                                      | DC-11        | 15.55,100.95 | -10.31 | -13.49 | 12.64  | -66.32  |

|    |     |                                                                        |              |              |        |        |        |         |
|----|-----|------------------------------------------------------------------------|--------------|--------------|--------|--------|--------|---------|
|    |     |                                                                        |              |              |        | 10.17  | -38.11 | -66.05  |
| 29 | 851 | $\pi$ - $\pi$ (1), Water mediated hydrogen bond (1)                    | DG-10        | 16.40,104.16 | -10.31 | -13.34 | -10.72 | -61.98  |
|    |     |                                                                        |              |              |        | 11.73  | -45.52 | -25.34  |
| 30 | 846 | Unbound                                                                | -            | 16.89,103.86 | -8.20  | -9.77  | -22.68 | -66.1   |
|    |     |                                                                        |              |              |        | 18.25  | -36.76 | -36.91  |
| 31 | 854 | Unbound                                                                | -            | 18.06,95.11  | -9.51  | -9.53  | -12.49 | -87.92  |
|    |     |                                                                        |              |              |        | 10.15  | -43.18 | -71.4   |
| 32 | 169 | Unbound                                                                | -            | 16.93,97.74  | -10.21 | 1.62   | 66.52  | 75.88   |
|    |     |                                                                        |              |              |        | 14.93  | -52.85 | -18.17  |
| 33 | 853 | $\pi$ -cation (2)                                                      | DC-11        | 16.43,97.15  | -10.91 | -9.51  | -26.24 | -84.44  |
|    |     |                                                                        |              |              |        | 11.83  | -27.87 | -31.63  |
| 34 | 857 | $\pi$ - $\pi$ (2), $\pi$ -cation (2), Water mediated hydrogen bond (1) | DG-10, DC-11 | 16.43,99.78  | -11.23 | -12.34 | -21.56 | -59.53  |
|    |     |                                                                        |              |              |        | 11.05  | -27.03 | -42.59  |
| 36 | 623 | $\pi$ - $\pi$ (1), Hydrogen bond (1)                                   | DC-9         | 15.94,91.02  | -10.05 | -8.08  | -30.95 | -79.51  |
|    |     |                                                                        |              |              |        | 13.8   | -25.63 | -5.08   |
| 37 | 855 | Unbound                                                                | -            | 15.55,92.19  | -9.55  | -11.1  | -17.7  | -5023   |
|    |     |                                                                        |              |              |        | 5.97   | -6.13  | -89.9   |
| 38 | 171 | Unbound                                                                | -            | 15.47,90.15  | -8.94  | 3.74   | 81.04  | 128.94  |
|    |     |                                                                        |              |              |        | 12.5   | -3.14  | -27.29  |
| 39 | 850 | $\pi$ - cation (1), Water mediated hydrogen bond (2)                   | DC-11        | 15.19,91.61  | -8.94  | -13.45 | -2.94  | -36.6   |
|    |     |                                                                        |              |              |        | 12.17  | -28.47 | -25.24  |
| 40 | 72  | $\pi$ - $\pi$ (2)                                                      | DG-10, DC-9  | 15.12,93.65  | -9.45  | 10.66  | -24.86 | 47.95   |
|    |     |                                                                        |              |              |        | 12.6   | -29.45 | -4.95   |
| 41 | 866 | $\pi$ - $\pi$ (1), Water mediated hydrogen bond (1)                    | DC-11, DG-10 | 14.98,92.48  | -10.38 | -10.31 | 5.09   | -103.44 |
|    |     |                                                                        |              |              |        | 10.77  | -39.12 | -40.32  |
| 42 | 205 | $\pi$ - $\pi$ (1), $\pi$ -cation (1), Water mediated hydrogen bond (2) | DC-13, DA-17 | 14.20,87.23  | -9.61  | 4.62   | 48.23  | 18.28   |
|    |     |                                                                        |              |              |        | 11.78  | -30.66 | -59.66  |
| 43 | 173 | Unbound                                                                | -            | 13.77,85.48  | -9.61  | 0.45   | -89.97 | -179.3  |

|    |     |                 |       |             |       |       |        |         |
|----|-----|-----------------|-------|-------------|-------|-------|--------|---------|
|    |     |                 |       |             |       | 6.27  | -35.65 | -124.87 |
| 44 | 206 | $\pi - \pi (1)$ | DC-13 | 13.77,88.10 | -9.61 | 4     | 89.61  | 82.95   |
|    |     |                 |       |             |       | 13.32 | -24.29 | -3.56   |

**Table S3.** Type of interactions present in the free energy minimum of L2 ligand

| S.No | Frame number | Type of interactions                                 | Interacting residues | Collective variables (Distance (Å) and Angle (°)) | Energy Kcal/mo l | Rise DT-8 DA17 | Roll DT-8 DA17    | Twist DT-8 DA17    |
|------|--------------|------------------------------------------------------|----------------------|---------------------------------------------------|------------------|----------------|-------------------|--------------------|
| 1    | 678          | Hydrogen bond (1), Water mediated hydrogen bond (1)  | DG-10, DG-12         | 14.14, 99.49                                      | -8.93            | 8.01<br>4.41   | 64.91<br>-31.47   | 17.11<br>-143.6    |
| 2    | 775          | Unbound                                              | -                    | 13.95, 95.98                                      | -8.93            | -8.17<br>5.47  | -101.98<br>-20.94 | 65.06<br>-141.18   |
| 3    | 768          | $\pi$ - $\pi$ (1), Hydrogen bond (1)                 | DT-7                 | 13.32, 97.15                                      | -8.93            | 0.35<br>6.33   | 58.17<br>-34.27   | -173.51<br>-149.51 |
| 4    | 707          | $\pi$ - cation (1)                                   | DC-21                | 13.36, 94.53                                      | -8.93            | -3.29<br>1.88  | -88.92<br>-50.83  | -129.35<br>-120.44 |
| 5    | 774          | $\pi$ - $\pi$ (2), Water mediated hydrogen bond (1)  | DC-21                | 13.17, 93.36                                      | -8.76            | -10.66<br>7.74 | -70.09<br>-71.89  | 19.71<br>-151.8    |
| 6    | 704          | $\pi$ - cation (1), Water mediated hydrogen bond (2) | DA-18, DT-19         | 12.89, 96.28                                      | -8.93            | 5.94<br>5.39   | 121.78<br>-32.44  | 39.48<br>-176.79   |
| 7    | 702          | $\pi$ - cation (1), Hydrogen bond (1)                | DA-18, DT-19         | 12.89, 96.28                                      | -8.76            | 8.33<br>5.24   | 108.28<br>32.57   | 22.04<br>170.19    |
| 8    | 701          | $\pi$ - cation (1)                                   | DA-18                | 13.44, 90.15                                      | -8.76            | -0.56<br>4.35  | 92.25<br>53.26    | -160.6<br>168.26   |
| 9    | 706          | Unbound                                              | -                    | 13.71, .86                                        | -8.76            | -9.17<br>-2.49 | 126.06<br>8.54    | -37.4<br>-107.73   |
| 10   | 779          | $\pi$ - cation (1), Hydrogen bond (1)                | DC-21, DT-7          | 13.98, 86.06                                      | -8.76            | -8.56<br>7.89  | 90.83<br>-50.19   | 30.02<br>-139.99   |
| 11   | 69           | Hydrogen bond (2)                                    | DG-4                 | 13.95, 85.27                                      | -8.43            | 6.77<br>5.31   | -49.35<br>-49.95  | 83.62<br>-156.98   |
| 12   | 762          | Hydrogen bond (1)                                    | DT-7                 | 13.05, 86.06                                      | -8.76            | -2.02<br>6.3   | 100.32<br>-42.33  | 163.66<br>-138.62  |
| 13   | 758          | $\pi$ - $\pi$ (1)                                    | DT-7                 | 12.54, 86.35                                      | -8.76            | -6.84<br>5.82  | 120.7<br>-38.05   | -70.86<br>-139.08  |

|    |     |                                                                                            |                   |              |       |       |         |         |
|----|-----|--------------------------------------------------------------------------------------------|-------------------|--------------|-------|-------|---------|---------|
| 14 | 64  | Hydrogen bond (2)                                                                          | DG-4              | 12.47, 84.31 | -8.43 | 4.15  | -31.87  | 72.72   |
|    |     |                                                                                            |                   |              |       | 5.15  | -59.95  | -122.1  |
| 15 | 51  | Hydrogen bond (2)                                                                          | DG-4              | 12.08, 83.73 | -8.70 | 4.12  | -44.9   | 127.6   |
|    |     |                                                                                            |                   |              |       | 4.67  | -62.05  | -117.56 |
| 16 | 729 | Unbound                                                                                    | -                 | 12.66, 81.98 | -8.43 | -4.18 | -120.41 | -75.22  |
|    |     |                                                                                            |                   |              |       | 0.02  | 57.09   | 98.6    |
| 17 | 757 | $\pi$ - $\pi$ (1), $\pi$ - cation (2), hydrogen bond (1), Water mediated hydrogen bond (1) | DG-4, DT-7, DC-21 | 11.80, 80.52 | -8.70 | -4.25 | -109.46 | 139.87  |
|    |     |                                                                                            |                   |              |       | 7.03  | -63.67  | -163.61 |
| 18 | 730 | $\pi$ - $\pi$ (1)                                                                          | DT-20             | 11.65, 84.02 | -8.70 | 1.44  | 118.2   | -148.3  |
|    |     |                                                                                            |                   |              |       | 1.56  | 45.26   | 110.51  |
| 19 | 756 | Unbound                                                                                    | -                 | 10.91, 79.93 | -8.70 | -6.76 | -99.34  | 87.22   |
|    |     |                                                                                            |                   |              |       | 4.97  | 93.8    | 169.07  |
| 20 | 765 | Hydrogen bond (1)                                                                          | DT-7              | 11.34, 77.01 | -8.70 | -0.36 | 107.31  | -177.97 |
|    |     |                                                                                            |                   |              |       | 6.3   | -36.5   | -148.84 |
| 21 | 49  | Hydrogen bond (2)                                                                          | DG-4              | 10.56, 75.56 | -7.32 | 6.11  | -68     | 96.48   |
|    |     |                                                                                            |                   |              |       | 6.02  | -74.83  | -157.43 |
| 22 | 81  | $\pi$ - $\pi$ (1), Hydrogen bond (2)                                                       | DG-4, DT-19       | 10.60, 74.39 | -7.32 | 3.52  | 14.88   | 18.3    |
|    |     |                                                                                            |                   |              |       | 5.2   | -77.58  | -141.96 |
| 23 | 50  | Hydrogen bond (1)                                                                          | DG-4              | 10.17, 71.47 | -8.76 | 5.29  | -35.14  | 83.71   |
|    |     |                                                                                            |                   |              |       | 4.74  | -56.99  | -142.82 |
| 24 | 792 | $\pi$ - $\pi$ (1)                                                                          | DT-19             | 9.97, 68.55  | -8.76 | -4.17 | -120.37 | 152.19  |
|    |     |                                                                                            |                   |              |       | 4.65  | -43.82  | 156.16  |
| 25 | 48  | Hydrogen bond (1), Water mediated hydrogen bond (3)                                        | DG-4, DC-3, DA-18 | 9.70, 70.30  | -8.76 | 6.75  | -64.03  | 90.05   |
|    |     |                                                                                            |                   |              |       | 5.35  | -64.89  | -146.41 |
| 26 | 37  | $\pi$ - $\pi$ (1), $\pi$ - cation (1), Hydrogen bond (2), Water mediated hydrogen bond (1) | DA-5, GD-4, Dt-19 | 9.58, 72.34  | -8.76 | 6.87  | -29.06  | 83.18   |
|    |     |                                                                                            |                   |              |       | 7.25  | -80.87  | -163.16 |
| 27 | 36  | $\pi$ - $\pi$ (1), $\pi$ - cation (1), Hydrogen bond (2), Water                            | DA-5, DG-4, DT-19 | 9.70, 66.22  | -9.11 | 8.33  | -49.18  | 74.45   |



|    |     |                                                                         |             |             |       |        |         |         |         |
|----|-----|-------------------------------------------------------------------------|-------------|-------------|-------|--------|---------|---------|---------|
|    |     | mediated hydrogen bond (1)                                              |             |             |       |        | 5.97    | -58.42  | -171.85 |
| 28 | 712 | $\pi$ - $\pi$ (1)                                                       | DT-8        | 9.51, 63.59 | -9.11 | -8.13  | -105.92 | 54.06   |         |
|    |     |                                                                         |             |             |       | -13.04 | 60.35   | -5.57   |         |
| 29 | 791 | Unbound                                                                 | -           | 9.93, 60.96 | -9.11 | -5.91  | -124.08 | -11.43  |         |
|    |     |                                                                         |             |             |       | 4.97   | -48.01  | -159.22 |         |
| 30 | 46  | Hydrogen bonding (1), Water mediated hydrogen bond (1)                  | DG-4        | 9.66, 57.46 | -8.08 | 5.7    | -50.10  | 92.3    |         |
|    |     |                                                                         |             |             |       | 6.16   | -52.69  | -174.19 |         |
| 31 | 807 | Hydrogen bond (1)                                                       | DT-8        | 8.96, 63.88 | -9.11 | 6.92   | 101.14  | 19.53   |         |
|    |     |                                                                         |             |             |       | 4.43   | -36.99  | -148.15 |         |
| 32 | 800 | Hydrogen bond (1), Water mediated hydrogen bond (1)                     | DT-8, DT-7  | 8.86, 66.51 | -9.11 | -6.44  | -116.36 | -71.32  |         |
|    |     |                                                                         |             |             |       | 5.24   | -59.89  | -150.95 |         |
| 33 | 713 | $\pi$ - $\pi$ (1), Water mediated hydrogen bond (1)                     | DT-8        | 8.49,5.34   | -9.11 | -4.03  | -100.06 | 136.47  |         |
|    |     |                                                                         |             |             |       | -8.71  | 40.4    | -50.26  |         |
| 34 | 797 | Hydrogen bond (1)                                                       | DT-8        | 8.42, 63.01 | -9.11 | 2.75   | 106.22  | 149.06  |         |
|    |     |                                                                         |             |             |       | 4.75   | -51.28  | -168.34 |         |
| 35 | 710 | $\pi$ - $\pi$ (1)                                                       | DT-8        | 8.18, 65.34 | -9.11 | 8.27   | 79.95   | -45.02  |         |
|    |     |                                                                         |             |             |       | -0.19  | -10.69  | -123.43 |         |
| 36 | 45  | $\pi$ - cation (1), Hydrogen bond (1), Water mediated hydrogen bond (1) | DA-17, DG-4 | 8.77, 63.01 | -9.11 | 2.45   | 9.6     | -8.35   |         |
|    |     |                                                                         |             |             |       | 6.29   | -68.84  | -164.87 |         |
| 37 | 713 | $\pi$ - $\pi$ (1), Water mediated hydrogen bond (2)                     | DT-8        | 8.42, 65.05 | -9.11 | -4.03  | -100.06 | 136.47  |         |
|    |     |                                                                         |             |             |       | -8.71  | 40.4    | -50.26  |         |
| 38 | 137 | $\pi$ - $\pi$ (1), Water mediated hydrogen bond (1)                     | DT-7        | 8.26, 58.34 | -8.08 | -8.87  | -40.37  | -64.2   |         |
|    |     |                                                                         |             |             |       | 5.76   | -50.12  | -159.28 |         |
| 39 | 799 | Hydrogen bond (2)                                                       | DT-8        | 7.75, 57.46 | -7.47 | -8.06  | -110.46 | 15.92   |         |
|    |     |                                                                         |             |             |       | 4.57   | -54.26  | -139.12 |         |

|    |     |                                                                        |                    |              |        |       |         |         |
|----|-----|------------------------------------------------------------------------|--------------------|--------------|--------|-------|---------|---------|
| 40 | 806 | Hydrogen bond (1), Water mediated hydrogen bond (1)                    | DT-8               | 8.42, 54.83  | -8.08  | -5.43 | -115.2  | -39.93  |
|    |     |                                                                        |                    |              |        | 5.1   | -60.77  | -173.17 |
| 41 | 802 | $\pi$ - $\pi$ (1), Hydrogen bond (3)                                   | DT-8               | 7.09, 57.75  | -7.47  | -6.52 | -109.51 | 90.04   |
|    |     |                                                                        |                    |              |        | 4.89  | -55.17  | -167.97 |
| 42 | 39  | $\pi$ - cation (1), Hydrogen bond (3)                                  | DG-4, DA-5, DT-7   | 7.56, 62.13  | -8.77  | 6.39  | -16.65  | 64.81   |
|    |     |                                                                        |                    |              |        | 7.28  | -44.06  | -174.25 |
| 43 | 798 | Hydrogen bond (1)                                                      | DT-8               | 7.32, 61.84  | -8.77  | 4.85  | 107.9   | 68.24   |
|    |     |                                                                        |                    |              |        | 5.48  | -52.66  | 117.57  |
| 44 | 41  | $\pi$ - cation (1), Hydrogen bond (2)                                  | DA-17, DG-4        | 6.90, 58.92  | -8.77  | 7.06  | -16.99  | 51.43   |
|    |     |                                                                        |                    |              |        | 7.5   | 55.61   | 172.73  |
| 45 | 803 | $\pi$ - $\pi$ (1), Hydrogen bond (1), Water mediated hydrogen bond (1) | DT-8, DT-7         | 6.74, 61.84  | -8.77  | 7.63  | 116.22  | 20.99   |
|    |     |                                                                        |                    |              |        | 5.35  | -50.97  | -174.86 |
| 46 | 34  | $\pi$ - $\pi$ (2), $\pi$ - cation (1), Hydrogen bond (3)               | DG-4, DT-19, DA-17 | 7.29, 68.55  | -7.18  | 8.05  | -87.48  | 11.4    |
|    |     |                                                                        |                    |              |        | 10.37 | 22.38   | 69.33   |
| 47 | 804 | $\pi$ - $\pi$ (1), Hydrogen bond (2), Water mediated hydrogen bond (1) | DG-4, DT-8, DT-7   | 7.56, 73.32  | -7.18  | -6.06 | -130.97 | 51.8    |
|    |     |                                                                        |                    |              |        | 4.57  | -53.78  | -155.29 |
| 48 | 750 | Water mediated hydrogen bond (1)                                       | DT-7               | 8.53, 78.77  | -10.15 | -8.33 | -98.9   | -21.98  |
|    |     |                                                                        |                    |              |        | 4.9   | -33.69  | -135.09 |
| 49 | 32  | $\pi$ - $\pi$ (2), $\pi$ - cation (1), Hydrogen bond (3)               | DG-4, DT-19, DT-20 | 8.26, 87.52  | -9.46  | 2.7   | -2.37   | 12.91   |
|    |     |                                                                        |                    |              |        | 8.85  | 33.17   | 133.54  |
| 50 | 20  | $\pi$ - $\pi$ (1), Water mediated hydrogen bond (1)                    | DT-20, DT-19       | 8.22, 81.98  | -10.45 | 2.86  | 5.93    | -3.71   |
|    |     |                                                                        |                    |              |        | 5.97  | -34.85  | -178.47 |
| 51 | 805 | $\pi$ - cation (1), Hydrogen bond (2)                                  | DC-21, DT-8        | 8.22, 83.43  | -10.45 | -3.42 | -125.2  | 141.95  |
|    |     |                                                                        |                    |              |        | 4.91  | 42.5    | 178.42  |
| 52 | 718 | $\pi$ - cation (1)                                                     | DC-21              | 9.58, 72.77  | -9.46  | -6.93 | -91.42  | 78.99   |
|    |     |                                                                        |                    |              |        | -8.49 | 15.1    | -51.72  |
| 53 | 743 | $\pi$ - $\pi$ (1)                                                      | DT-7               | 10.60, 93.94 | -9.43  | -3.84 | -88.8   | 143.05  |

|    |     |                                                                        |                    |              |        |        |         |         |
|----|-----|------------------------------------------------------------------------|--------------------|--------------|--------|--------|---------|---------|
|    |     |                                                                        |                    |              |        | 8.14   | 45.94   | 131.97  |
| 54 | 766 | $\pi$ - $\pi$ (1), Water mediated hydrogen bond (1)                    | DT-7, DT-8         | 11.49, 93.36 | -9.43  | -4.54  | -106.83 | 126.72  |
|    |     |                                                                        |                    |              |        | 6.28   | -42.17  | -129.32 |
| 55 | 724 | Unbound                                                                | -                  | 11.88, 91.90 | -9.43  | -8.58  | -109.37 | 4.82    |
|    |     |                                                                        |                    |              |        | -2.28  | 68.42   | 100.2   |
| 56 | 708 | Unbound                                                                | -                  | 11.88, 89.86 | -9.43  | -1.91  | -112.25 | -112.34 |
|    |     |                                                                        |                    |              |        | 3.81   | -75.16  | -124.23 |
| 57 | 709 | Unbound                                                                | -                  | 11.49, 96.57 | -7.54  | 5.87   | 117.48  | 71.43   |
|    |     |                                                                        |                    |              |        | 0.85   | -35.8   | -105.43 |
| 58 | 778 | $\pi$ - cation (1)                                                     | DC-21              | 12.00, 96.28 | -7.54  | 3.64   | 103.95  | -120.34 |
|    |     |                                                                        |                    |              |        | 4.97   | -39.71  | -140.8  |
| 59 | 732 | $\pi$ - cation (1)                                                     | DC-21              | 11.84, 96.86 | -7.54  | -6.38  | -103.05 | 86.18   |
|    |     |                                                                        |                    |              |        | 3.83   | 59.37   | 108.56  |
| 60 | 38  | $\pi$ - $\pi$ (2), Hydrogen bond (3), Water mediated hydrogen bond (1) | DG-4, DT-19, DT-20 | 9.31, 89.10  | 9.73   | 7.74   | -37.71  | 74.16   |
|    |     |                                                                        |                    |              |        | 5.26   | -73.93  | -135.15 |
| 61 | 759 | Hydrogen bond (2)                                                      | DT-8               | 10.48, 87.52 | -9.43  | -8.7   | -110.23 | 26.57   |
|    |     |                                                                        |                    |              |        | 5.88   | -57.14  | -124.53 |
| 62 | 723 | Unbound                                                                | -                  | 10.52, 82.27 | -8.70  | 8.58   | 85.31   | 37.12   |
|    |     |                                                                        |                    |              |        | 1.44   | 87.76   | 132.47  |
| 63 | 754 | Unbound                                                                | -                  | 9.97, 83.73  | -10.45 | -9.24  | -100.73 | 37.3    |
|    |     |                                                                        |                    |              |        | 6.83   | -78.42  | -156.86 |
| 64 | 715 | Unbound                                                                | -                  | 9.51, 90.73  | -9.73  | 7.23   | 111.91  | 74.2    |
|    |     |                                                                        |                    |              |        | -10.01 | 24.13   | -14.31  |
| 65 | 711 | $\pi$ - $\pi$ (1)                                                      | DT-8               | 9.43, 79.64  | -10.45 | -4.92  | -111.3  | 99.11   |
|    |     |                                                                        |                    |              |        | -14.16 | 46.76   | -0.12   |
| 66 | 754 | Unbound                                                                | -                  | 9.39, 80.52  | -10.45 | 5.84   | -135.31 | -64.2   |
|    |     |                                                                        |                    |              |        | 6.83   | -78.42  | -156.86 |

**Table S4.** Type of interactions present in the free energy minimum of L3 ligand

| S.No | Frame number | Type of interactions                 | Interacting residues | Collective variables (Distance (Å) and Angle (°)) | Energy kcal/mo l | Rise   | Roll    | Twist  |
|------|--------------|--------------------------------------|----------------------|---------------------------------------------------|------------------|--------|---------|--------|
| 1    | 982          | Water mediated hydrogen bond (1)     | DT-20                | 21.08, 98.61                                      | -7.59            | 3.11   | 33.99   | 157.71 |
|      |              |                                      |                      |                                                   |                  | -7.35  | 77.03   | -20.84 |
| 2    | 893          | $\pi$ - $\pi$ (1)                    | DT-19                | 22.15, 96.28                                      | -7.59            | 7.4    | 57.01   | -12.81 |
|      |              |                                      |                      |                                                   |                  | -7.84  | 76.78   | -27.34 |
| 3    | 910          | Hydrogen bond (2)                    | DT-20, DG-24         | 21.14, 94.82                                      | -9.77            | 7.04   | 48.14   | 2.51   |
|      |              |                                      |                      |                                                   |                  | -9.27  | 75.48   | 28     |
| 4    | 985          | $\pi$ - $\pi$ (3)                    | DT-19, DT-20         | 21.53, 91.31                                      | -10.09           | 7.6    | 54.01   | 74.83  |
|      |              |                                      |                      |                                                   |                  | -7.97  | 60.82   | -18.26 |
| 5    | 913          | $\pi$ - $\pi$ (1)                    | DT-20                | 20.59, 82.85                                      | -9.07            | 2.42   | 97.76   | -58.3  |
|      |              |                                      |                      |                                                   |                  | -7.76  | 73.28   | -14.87 |
| 6    | 949          | $\pi$ - $\pi$ (2), Hydrogen bond (1) | DT-19                | 20.70, 81.68                                      | -9.07            | 4.97   | 52.03   | 98.88  |
|      |              |                                      |                      |                                                   |                  | -9.56  | 91.15   | -26.78 |
| 7    | 497          | Unbound                              | -                    | 21.72, 79.35                                      | -7.92            | 4.37   | 8.18    | 2.23   |
|      |              |                                      |                      |                                                   |                  | -0.12  | -152.09 | 135.77 |
| 8    | 474          | Unbound                              | -                    | 20.90, 77.01                                      | -7.56            | 7.38   | 80.32   | 60.39  |
|      |              |                                      |                      |                                                   |                  | -7.71  | 96.25   | 1.07   |
| 9    | 796          | $\pi$ - $\pi$ (1), $\pi$ -cation (1) | DC-9, DT-19          | 21.21, 75.56                                      | -7.74            | -2.75  | 30.4    | -18.03 |
|      |              |                                      |                      |                                                   |                  | -10.16 | 112.98  | -68.19 |
| 10   | 505          | Unbound                              | -                    | 21.33, 74.68                                      | -7.74            | 2.92   | -22.52  | 4.1    |
|      |              |                                      |                      |                                                   |                  | -12    | 133.93  | -29.64 |
| 11   | 234          | $\pi$ - $\pi$ (1)                    | DT-19                | 20.32, 74.39                                      | -7.56            | 4.23   | 63.7    | 51.05  |
|      |              |                                      |                      |                                                   |                  | -12.32 | 150.84  | -64.34 |
| 12   | 277          | Unbound                              | -                    | 20.59, 73.22                                      | -7.68            | -1.51  | 35.18   | -22.69 |
|      |              |                                      |                      |                                                   |                  | -8.21  | 63.69   | 7.12   |
| 13   | 74           | Unbound                              | -                    | 19.61, 77.01                                      | -7.69            | 2.05   | 91.63   | 119.44 |
|      |              |                                      |                      |                                                   |                  | -10.18 | 110.56  | -12.01 |
| 14   | 473          | Unbound                              | -                    | 19.61, 77.01                                      | -7.69            | 6.51   | 80.94   | 74.6   |
|      |              |                                      |                      |                                                   |                  | -8.28  | 68.32   | -2.63  |

|    |     |                                                                                       |                         |                  |       |        |        |        |
|----|-----|---------------------------------------------------------------------------------------|-------------------------|------------------|-------|--------|--------|--------|
| 15 | 62  | Unbound                                                                               | -                       | 19.22,<br>74.10  | -8.21 | 6.09   | 49.94  | 39.74  |
|    |     |                                                                                       |                         |                  |       | -9.95  | 102.57 | -96.42 |
| 16 | 242 | Unbound                                                                               | -                       | 19.92,<br>70.01  | -8.72 | 8.98   | 28.97  | 17.25  |
|    |     |                                                                                       |                         |                  |       | -10.31 | 147.39 | -0.76  |
| 17 | 829 | $\pi$ - $\pi$ (1)                                                                     | DT-20                   | 19.69,<br>69.13  | -8.72 | -6.85  | 19.85  | -17.84 |
|    |     |                                                                                       |                         |                  |       | 2.78   | 157.19 | 168.69 |
| 18 | 964 | $\pi$ - $\pi$ (2)                                                                     | DT-19                   | 19.69,<br>67.97  | -8.72 | 6.39   | 90.79  | -52.88 |
|    |     |                                                                                       |                         |                  |       | -10.12 | 97.95  | -21.06 |
| 19 | 235 | Unbound                                                                               | -                       | 20.00,<br>67.68  | -8.72 | 6.48   | 38.08  | -19.4  |
|    |     |                                                                                       |                         |                  |       | -8.32  | 106.33 | 15.7   |
| 20 | 840 | $\pi$ - $\pi$ (2),<br>Hydrogen bond<br>(2), Water<br>mediated<br>hydrogen bond<br>(1) | DT-20, DG-<br>24        | -19.33,<br>68.55 | -8.72 | -9.51  | 5.06   | 37.82  |
|    |     |                                                                                       |                         |                  |       | -4.13  | 138.89 | 93.31  |
| 21 | 881 | Unbound                                                                               | -                       | 20.70,<br>66.80  | -8.01 | -5.44  | -21.22 | -9.48  |
|    |     |                                                                                       |                         |                  |       | -3.92  | 43.34  | 43.99  |
| 22 | 901 | $\pi$ - $\pi$ (1),<br>Hydrogen bond<br>(2)                                            | DT-19, DT-<br>20, DG-24 | 21.18,<br>65.63  | -7.64 | -0.69  | 93.85  | 37.45  |
|    |     |                                                                                       |                         |                  |       | -8.9   | 82.93  | -58.15 |
| 23 | 895 | Unbound                                                                               | -                       | 18.55,<br>77.01  | -8.21 | 7.31   | 65.46  | 0.75   |
|    |     |                                                                                       |                         |                  |       | -8.62  | 108.14 | -13.74 |
| 24 | 240 | Unbound                                                                               | -                       | 19.06,<br>61.25  | -7.94 | 6.48   | 38.08  | -19.4  |
|    |     |                                                                                       |                         |                  |       | -8.32  | 106.33 | 15.7   |
| 25 | 958 | $\pi$ - $\pi$ (1),<br>Hydrogen bond<br>(1), Water<br>mediated<br>hydrogen bond<br>(1) | DT-19, DT-7             | 19.14,<br>58.34  | -7.83 | 7.81   | 37.35  | 81.15  |
|    |     |                                                                                       |                         |                  |       | -7.79  | 73.03  | -17    |
| 26 | 963 | $\pi$ - $\pi$ (2)                                                                     | DT-20, DT-<br>19        | 18.43,<br>62.13  | -7.94 | 8.18   | 53.9   | 82.69  |
|    |     |                                                                                       |                         |                  |       | -11.04 | 103.87 | -29.79 |
| 27 | 241 | Unbound                                                                               | -                       | 17.92,<br>67.38  | -8.41 | 7.48   | 18.07  | -25.03 |
|    |     |                                                                                       |                         |                  |       | -8.07  | 122.14 | 24.33  |
| 28 | 479 | Water mediated<br>hydrogen bond<br>(1)                                                | DG-14                   | 17.84,<br>63.01  | -8.75 | -0.32  | 86.96  | -2.5   |
|    |     |                                                                                       |                         |                  |       | -10.26 | 111.93 | -64.55 |

|    |     |                                            |                 |                 |       |        |         |         |
|----|-----|--------------------------------------------|-----------------|-----------------|-------|--------|---------|---------|
| 29 | 815 | $\pi$ - $\pi$ (1)                          | DT-20           | 17.77,<br>62.71 | -8.67 | -2.48  | 14.45   | 6.73    |
|    |     |                                            |                 |                 |       | -5.75  | 47.23   | 11.12   |
| 30 | 496 | $\pi$ - $\pi$ (1)                          | DC-13           | 17.34,<br>62.13 | -8.19 | 2.98   | -34.43  | 9.02    |
|    |     |                                            |                 |                 |       | -7.04  | 132.49  | -154.58 |
| 31 | 63  | Water mediated<br>hydrogen bond<br>(1)     | Dt-20           | 17.96,<br>58.63 | -7.99 | 6.3    | 50.5    | 49.5    |
|    |     |                                            |                 |                 |       | -13.29 | 106.93  | -60.04  |
| 32 | 61  | $\pi$ - $\pi$ (1)                          | DC-3            | 17.73,<br>56.00 | -7.99 | 3.4    | 6.34    | 49.92   |
|    |     |                                            |                 |                 |       | -5.15  | 36.32   | -133.28 |
| 33 | 827 | $\pi$ - $\pi$ (1)                          | DT-20           | 17.53,<br>57.75 | -7.99 | -3.95  | -12.63  | -7.77   |
|    |     |                                            |                 |                 |       | 3.29   | -147.77 | -174.36 |
| 34 | 231 | Unbound                                    | -               | 17.37,<br>78.77 | -7.59 | 5.82   | -28.08  | -16.32  |
|    |     |                                            |                 |                 |       | -7.89  | 84.88   | -125.62 |
| 35 | 480 | Water mediated<br>hydrogen bond<br>(1)     | DC-13           | 17.30,<br>70.01 | -8.50 | -3.81  | 31.65   | 6.62    |
|    |     |                                            |                 |                 |       | -8.89  | 115.68  | -17.63  |
| 36 | 710 | $\pi$ - $\pi$ (1),<br>Hydrogen bond<br>(1) | DT-8, DT-20     | 16.94,65.63     | -8.42 | 9.85   | 51.91   | 11.49   |
|    |     |                                            |                 |                 |       | -10.39 | 113.69  | -94.68  |
| 37 | 721 | Unbound                                    | -               | 16.24,<br>66.22 | -8.88 | 8.79   | 52.56   | 9.43    |
|    |     |                                            |                 |                 |       | -7.59  | 85.38   | -45.17  |
| 38 | 724 | $\pi$ - $\pi$ (1)                          | DT-19           | 15.89,<br>60.96 | -8.42 | 0.13   | 57.67   | -179.25 |
|    |     |                                            |                 |                 |       | -9.04  | 89.31   | 0.31    |
| 39 | 229 | $\pi$ - $\pi$ (1)                          | DT-19           | 15.77,<br>63.59 | -8.88 | 7.51   | 60.78   | 67.29   |
|    |     |                                            |                 |                 |       | -11.45 | 122.78  | -58.31  |
| 40 | 478 | Unbound                                    | -               | 15.53,<br>62.42 | -7.60 | -2.03  | 26.37   | 10.71   |
|    |     |                                            |                 |                 |       | -8.61  | 89.25   | -26.24  |
| 41 | 969 | $\pi$ - $\pi$ (1)                          | DT-20           | 15.49,<br>66.22 | -8.17 | 2.72   | 48.06   | 167.04  |
|    |     |                                            |                 |                 |       | -9.41  | 70.64   | 3.33    |
| 42 | 836 | $\pi$ - $\pi$ (1),<br>Hydrogen bond<br>(1) | DT-19 DG-<br>24 | 15.46,<br>68.84 | -8.36 | -8.47  | -54.25  | 55.33   |
|    |     |                                            |                 |                 |       | -2.17  | 146.58  | 116.54  |
| 43 | 720 | Unbound                                    | -               | 14.91,<br>67.09 | -8.36 | 8.52   | 57.09   | 35.06   |
|    |     |                                            |                 |                 |       | -11.09 | 113.92  | -44.31  |
| 44 | 714 | $\pi$ - $\pi$ (1)                          | DT-20           | 16.47,<br>81.39 | -7.77 | 9.48   | 24.27   | 8.86    |
|    |     |                                            |                 |                 |       | -10.4  | 120.04  | -46     |

|    |     |                                                     |              |                 |       |        |         |         |
|----|-----|-----------------------------------------------------|--------------|-----------------|-------|--------|---------|---------|
| 45 | 221 | Unbound                                             | -            | 16.43,<br>80.52 | -8.18 | 9.09   | 55.61   | 14.52   |
|    |     |                                                     |              |                 |       | -11.17 | 122.22  | -98.33  |
| 46 | 970 | $\pi$ - $\pi$ (1), Water mediated hydrogen bond (1) | DT-20        | 16.67,<br>76.14 | -7.86 | 8.2    | 46.26   | 35.81   |
|    |     |                                                     |              |                 |       | -7.79  | 56.84   | 11.53   |
| 47 | 826 | $\pi$ - $\pi$ (1), Hydrogen bond (1)                | DT-19, DG-24 | 16.47,<br>75.85 | -8.65 | 0.34   | 85.12   | -83.34  |
|    |     |                                                     |              |                 |       | 10.68  | -127.26 | -78.7   |
| 48 | 832 | Unbound                                             | -            | 16.16,<br>76.43 | -8.65 | -3.77  | -14.34  | -4.03   |
|    |     |                                                     |              |                 |       | -3.83  | 126.52  | 69.53   |
| 49 | 831 | $\pi$ - $\pi$ (1)                                   | DT-20        | 15.69,<br>79.53 | -8.18 | -2     | 3.75    | -1.06   |
|    |     |                                                     |              |                 |       | -2.85  | 147.16  | 93.43   |
| 50 | 476 | Unbound                                             | -            | 15.57,<br>81.39 | -7.44 | 2.98   | -34.43  | 9.02    |
|    |     |                                                     |              |                 |       | -7.04  | 132.49  | -154.58 |
| 51 | 738 | $\pi$ - $\pi$ (1)                                   | DT-20        | 15.38,<br>81.10 | -7.44 | 8.3    | 67.72   | 27.26   |
|    |     |                                                     |              |                 |       | -6.49  | 78.7    | -25.31  |
| 52 | 66  | Hydrogen bond (1)                                   | DT-19        | 14.40,<br>80.81 | -7.64 | 259    | -107.03 | -176.24 |
|    |     |                                                     |              |                 |       | 8.91   | -174.92 | -124.16 |
| 53 | 477 | Unbound                                             | -            | 14.51,<br>77.89 | -7.64 | -1.71  | -2.43   | -22.81  |
|    |     |                                                     |              |                 |       | -7.16  | 58.44   | -15.2   |
| 54 | 716 | $\pi$ - $\pi$ (1)                                   | DG-24        | 14.01,<br>70.59 | -8.27 | 9.62   | 47.83   | 16.55   |
|    |     |                                                     |              |                 |       | -9     | 99.03   | -15.93  |
| 55 | 824 | Unbound                                             | -            | 14.48,<br>73.22 | -8.27 | -7.02  | -37.92  | 13.6    |
|    |     |                                                     |              |                 |       | 7.66   | -169.89 | -129.95 |
| 56 | 502 | Unbound                                             | -            | 14.48,<br>70.89 | -8.27 | 3.65   | -3.61   | 1.07    |
|    |     |                                                     |              |                 |       | -8.27  | 140.81  | 147.86  |
| 57 | 973 | $\pi$ - $\pi$ (1)                                   | DG-24        | 14.01,<br>70.59 | -8.24 | 5.31   | 43.77   | 134.02  |
|    |     |                                                     |              |                 |       | -8.4   | 72.22   | 1.11    |
| 58 | 725 | Unbound                                             | -            | 13.85,<br>67.68 | -8.05 | 8.64   | 52.19   | 30.11   |
|    |     |                                                     |              |                 |       | -7.96  | 63.31   | -29.44  |
| 59 | 830 | Unbound                                             | -            | 14.12,<br>75.26 | -7.97 | -3.63  | -2.95   | -16.28  |
|    |     |                                                     |              |                 |       | -6.33  | 153.48  | 60.96   |
| 60 | 718 | Unbound                                             | -            | 13.85,<br>74.68 | -7.98 | 8.66   | 61.56   | -1.32   |
|    |     |                                                     |              |                 |       | -9.92  | 111.44  | -24.83  |

|    |     |                                                                                       |                  |                 |       |        |         |         |
|----|-----|---------------------------------------------------------------------------------------|------------------|-----------------|-------|--------|---------|---------|
| 61 | 978 | Unbound                                                                               | -                | 73.57,<br>75.85 | -7.92 | 8.32   | 57.75   | 44.37   |
|    |     |                                                                                       |                  |                 |       | -10.94 | 105.99  | -62.88  |
| 62 | 65  | Unbound                                                                               | -                | 13.26,<br>72.05 | -8.26 | 1.76   | 118.41  | 48.7    |
|    |     |                                                                                       |                  |                 |       | -10.65 | 103.55  | -68.84  |
| 63 | 732 | Unbound                                                                               | -                | 13.18,<br>79.93 | -7.91 | 8.92   | 23.77   | 0.26    |
|    |     |                                                                                       |                  |                 |       | -5.44  | 63.66   | -3.78   |
| 64 | 744 | $\pi$ - $\pi$ (2)                                                                     | DT-19            | 13.07,<br>81.98 | 7.86  | 1.5    | -66.32  | -179.06 |
|    |     |                                                                                       |                  |                 |       | -10.28 | 98.36   | -27.95  |
| 65 | 785 | Unbound                                                                               | -                | 12.60,<br>81.10 | -8.07 | -3.89  | -15.32  | -3.72   |
|    |     |                                                                                       |                  |                 |       | -10.09 | 98.9    | -36.12  |
| 66 | 835 | $\pi$ - $\pi$ (1),<br>Hydrogen bond<br>(1), Water<br>mediated<br>hydrogen bond<br>(1) | DT-20, DG-<br>24 | 12.83,<br>83.73 | -8.07 | -9.74  | -4.95   | 37.06   |
|    |     |                                                                                       |                  |                 |       | -2.91  | 156.96  | 125.6   |
| 67 | 745 | Unbound                                                                               | -                | 13.89,<br>88.69 | -8.00 | 7.64   | 63      | 49.44   |
|    |     |                                                                                       |                  |                 |       | -9.84  | 91.84   | 27.08   |
| 68 | 199 | Unbound                                                                               | -                | 13.26,<br>88.40 | -8.00 | 2.28   | 37      | -27.06  |
|    |     |                                                                                       |                  |                 |       | -12.23 | 122.06  | -34     |
| 69 | 499 | unbound                                                                               | -                | 12.91,<br>90.15 | 7.82  | 2.35   | -21.47  | 8.28    |
|    |     |                                                                                       |                  |                 |       | 8.42   | -155.79 | 29.25   |
| 70 | 743 | $\pi$ - $\pi$ (2)                                                                     | DT-19            | 13.14,<br>92.77 | -8.25 | 9.23   | 54.22   | 21.29   |
|    |     |                                                                                       |                  |                 |       | -10.06 | 94.15   | -47.37  |
| 71 | 198 | Water mediated<br>hydrogen bond<br>(1)                                                | DG-24            | 13.10,<br>94.23 | -8.25 | 7.49   | 20.01   | 7.11    |
|    |     |                                                                                       |                  |                 |       | -11.94 | 131.5   | -92.17  |
| 72 | 745 | Unbound                                                                               | -                | 13.97,<br>88.98 | -7.80 | 7.64   | 63      | 49.44   |
|    |     |                                                                                       |                  |                 |       | -9.84  | 91.84   | -27.08  |
| 73 | 711 | Unbound                                                                               | -                | 13.73,<br>91.90 | -8.25 | 8.73   | 39.24   | 9.8     |
|    |     |                                                                                       |                  |                 |       | -10.43 | 104.4   | -82.51  |
| 74 | 729 | $\pi$ - $\pi$ (1)                                                                     | DT-19            | 13.93,<br>94.23 | -7.88 | 8.45   | 66.36   | 23.57   |
|    |     |                                                                                       |                  |                 |       | -4.55  | 70.41   | 17.3    |
| 75 | 500 | Unbound                                                                               | -                | 13.34,<br>99.78 | -8.07 | 3.97   | -5.23   | 13.38   |
|    |     |                                                                                       |                  |                 |       | -8.95  | 144.51  | -141.29 |



|    |     |                                                              |                  |                 |       |        |         |         |
|----|-----|--------------------------------------------------------------|------------------|-----------------|-------|--------|---------|---------|
| 76 | 713 | $\pi$ - $\pi$ (1)                                            | DT-20            | 14.91,<br>89.86 | -7.57 | 8.18   | 61.57   | 30.92   |
|    |     |                                                              |                  |                 |       | -9.72  | 113.01  | -66.02  |
| 77 | 712 | Unbound                                                      | -                | 15.06,<br>91.69 | -7.58 | 8.71   | 49.13   | 44.73   |
|    |     |                                                              |                  |                 |       | -9.76  | 114.52  | -78.25  |
| 78 | 222 | $\pi$ - $\pi$ (2)                                            | DT-19, DT-<br>20 | 14.87,<br>93.36 | -7.58 | 7.92   | 47.12   | 26.11   |
|    |     |                                                              |                  |                 |       | -11.67 | 113.09  | -50.8   |
| 79 | 213 | $\pi$ - $\pi$ (2), Water<br>mediated<br>hydrogen bond<br>(1) | DT-19            | 14.79,<br>95.40 | -7.86 | 6.94   | 41.41   | 19.79   |
|    |     |                                                              |                  |                 |       | -10.99 | 138.55  | -97.37  |
| 80 | 68  | $\pi$ - $\pi$ (1), Water<br>mediated<br>hydrogen bond<br>(1) | DC-21, DT-<br>19 | 14.48,<br>96.28 | -7.86 | 3.36   | -97.03  | -158.97 |
|    |     |                                                              |                  |                 |       | -9.43  | 126.94  | -2.5    |
| 81 | 73  | Water mediated<br>hydrogen bond<br>(1)                       | DG-2             | 20.12,<br>80.52 | -6.95 | 3.12   | -100.49 | -168.56 |
|    |     |                                                              |                  |                 |       | -10.66 | 107.51  | -44.28  |

**Table S5.** Rise, roll and twist of DC-11 residue in intercalation and unbound state of L1 ligand

| <b>Frame number of intercalated snapshot</b> | <b>Rise</b> | <b>Roll</b> | <b>Twist</b> |
|----------------------------------------------|-------------|-------------|--------------|
| 71                                           | 5.49        | -38.51      | 57.87        |
| 72                                           | 10.66       | -24.86      | 47.95        |
| 205                                          | 4.62        | 48.23       | 18.28        |
| 206                                          | 4           | 89.61       | 82.95        |
| 208                                          | 2.51        | 94.13       | 57.17        |
| 849                                          | -12.5       | -6.93       | -52.26       |
| 860                                          | -10.08      | -6.41       | -89.8        |
| 861                                          | -7.52       | -38.32      | -89.86       |
| 850                                          | -13.45      | -2.94       | -36.6        |
| <b>Frame number for unbounded snapshot</b>   | <b>Rise</b> | <b>Roll</b> | <b>Twist</b> |
| 73                                           | 8.81        | -11.75      | 31.39        |
| 172                                          | 2.23        | 89.08       | 122.4        |
| 169                                          | 1.62        | 66.52       | 75.88        |
| 171                                          | 3.74        | 81.04       | 128.94       |
| 173                                          | 0.45        | -89.97      | -179.3       |
| 442                                          | -7.6        | -3.05       | -108.5       |
| 889                                          | -7.5        | -28.63      | -98.86       |
| 864                                          | -9.03       | -12.61      | -112.68      |
| 859                                          | -8.55       | -18.71      | -86.58       |

**Table S6.** Rise, roll and twist of DC-11 residue in intercalation and unbound state of L2 ligand

| <b>Frame number of intercalated snapshot</b> | <b>Rise</b> | <b>Roll</b> | <b>Twist</b> |
|----------------------------------------------|-------------|-------------|--------------|
| 36                                           | 8.33        | -49.18      | 74.45        |
| 37                                           | 6.87        | -29.06      | 83.18        |
| 678                                          | 8.01        | 64.91       | 17.11        |
| 701                                          | -0.56       | 92.25       | -106.6       |
| 702                                          | 8.33        | 108.28      | 22.04        |
| 704                                          | 5.94        | 121.78      | 39.48        |
| 712                                          | -8.13       | -105.92     | 54.06        |
| 713                                          | -4.03       | -100.86     | 136.47       |
| 757                                          | -4.25       | -109.46     | 139.87       |
| 779                                          | -8.56       | 90.83       | 30.02        |
| <b>Frame number for unbounded snapshot</b>   | <b>Rise</b> | <b>Roll</b> | <b>Twist</b> |
| 706                                          | -9.17       | 26.06       | -37.4        |
| 708                                          | -1.91       | -112.85     | -112.34      |
| 709                                          | 5.87        | 117.48      | 71.43        |
| 715                                          | 7.23        | 111.91      | 74.2         |
| 723                                          | 8.58        | 85.31       | 37.12        |
| 724                                          | -8.58       | -107.37     | 4.82         |
| 729                                          | -4.18       | -120.41     | -75.22       |
| 756                                          | -0.36       | 107.31      | 177.97       |
| 775                                          | -8.17       | -101.98     | 65.06        |
| 791                                          | -5.91       | -124.08     | -11.43       |

**Table S7.** Rise, roll and twist of DC-11 residue in intercalation and unbound state of L3 ligand

| <b>Frame number of intercalated snapshot</b> | <b>Rise</b> | <b>Roll</b> | <b>Twist</b> |
|----------------------------------------------|-------------|-------------|--------------|
| 234                                          | 4.23        | 63.7        | 51.03        |
| 710                                          | 9.85        | 51.91       | 11.49        |
| 724                                          | 8.79        | 52.56       | 9.43         |
| 796                                          | -2.75       | 30.4        | -18.03       |
| 829                                          | -6.85       | 19.85       | -17.84       |
| 893                                          | 7.4         | 57.01       | 74.83        |
| 913                                          | 2.42        | 97.76       | -58.3        |
| 949                                          | 4.97        | 52.03       | 98.88        |
| 958                                          | 7.81        | 37.35       | 81.15        |
| 964                                          | 6.39        | 90.79       | -52.88       |
| 985                                          | 7.6         | 54.01       | 74.83        |
| <b>Frame number for unbounded snapshot</b>   | <b>Rise</b> | <b>Roll</b> | <b>Twist</b> |
| 74                                           | 2.05        | 91.63       | 119.44       |
| 240                                          | 6.48        | 38.08       | -19.4        |
| 241                                          | 7.48        | 18.07       | -25.03       |
| 277                                          | -1.51       | 35.18       | -22.69       |
| 473                                          | 6.51        | 80.94       | 74.6         |
| 474                                          | 7.38        | 80.32       | 60.39        |
| 497                                          | 4.37        | 8.18        | 2.23         |
| 505                                          | 2.92        | -22.52      | 4.1          |
| 881                                          | -5.44       | -21.22      | -9.48        |
| 895                                          | 7.31        | 65.96       | 0.75         |
